# Supplementary material for: Absorption Coefficients of Phenolic Structures in Different Solvents Routinely Used for Experiments
Source: MDPI journal article supplement (doi:10.3390/molecules26154656), 2021-07-31
Supplement: s1 [file s1]

# Supplemental material

**Table S1.** Absorption coefficients of anthocyanidin-3-glucosides calculated by mass concentration  $\gamma$  determined by balance and q-NMR in aqueous buffer at pH 1.

| ACY       | $\lambda = 520 \text{ nm}$                                                |                                                                           | $\lambda_{\text{max}} \text{ [nm]}$ | $\lambda \text{ max}$                                                     |                                                                           | Difference of $\epsilon$<br>between<br>calculation based<br>on q-NMR and<br>balance <sup>[b]</sup> [%] | $\epsilon$ according to<br>[10] |
|-----------|---------------------------------------------------------------------------|---------------------------------------------------------------------------|-------------------------------------|---------------------------------------------------------------------------|---------------------------------------------------------------------------|--------------------------------------------------------------------------------------------------------|---------------------------------|
|           | balance                                                                   | NMR                                                                       |                                     | balance                                                                   | NMR                                                                       |                                                                                                        |                                 |
|           | $\epsilon /$<br>( $\text{L} \cdot \text{mol}^{-1} \cdot \text{cm}^{-1}$ ) | $\epsilon /$<br>( $\text{L} \cdot \text{mol}^{-1} \cdot \text{cm}^{-1}$ ) |                                     | $\epsilon /$<br>( $\text{L} \cdot \text{mol}^{-1} \cdot \text{cm}^{-1}$ ) | $\epsilon /$<br>( $\text{L} \cdot \text{mol}^{-1} \cdot \text{cm}^{-1}$ ) |                                                                                                        |                                 |
| PEL-3-glc | 15849 $\pm$ 2070                                                          | 20317 $\pm$ 423                                                           | 497                                 | 21843 $\pm$ 2825                                                          | 28006 $\pm$ 774                                                           | 128                                                                                                    | 27300                           |
| CYD-3-glc | 25526 $\pm$ 428                                                           | 29619 $\pm$ 167                                                           | 510                                 | 26953 $\pm$ 464                                                           | 31275 $\pm$ 270                                                           | 116                                                                                                    | 26900                           |
| DPD-3-glc | 26935 $\pm$ 680                                                           | 34070 $\pm$ 580                                                           | 516                                 | 27087 $\pm$ 671                                                           | 34263 $\pm$ 567                                                           | 127                                                                                                    |                                 |
| PET-3-glc | 26821 $\pm$ 1386                                                          | 37438 $\pm$ 140                                                           | 516                                 | 26892 $\pm$ 1353                                                          | 37540 $\pm$ 192                                                           | 140                                                                                                    |                                 |
| PEO-3-glc | 23926 $\pm$ 898                                                           | 29451 $\pm$ 185                                                           | 510                                 | 25141 $\pm$ 931                                                           | 30947 $\pm$ 210                                                           | 123                                                                                                    |                                 |
| MLV-3-glc | 27911 $\pm$ 437                                                           | 33140 $\pm$ 251                                                           | 518                                 | 27923 $\pm$ 443                                                           | 33154 $\pm$ 257                                                           | 119                                                                                                    | 28000                           |

**Figure S1.** Proton spectra recorded at a 400 MHz Spectrometer of delphinidin-3-O-glucoside in buffer pH 1

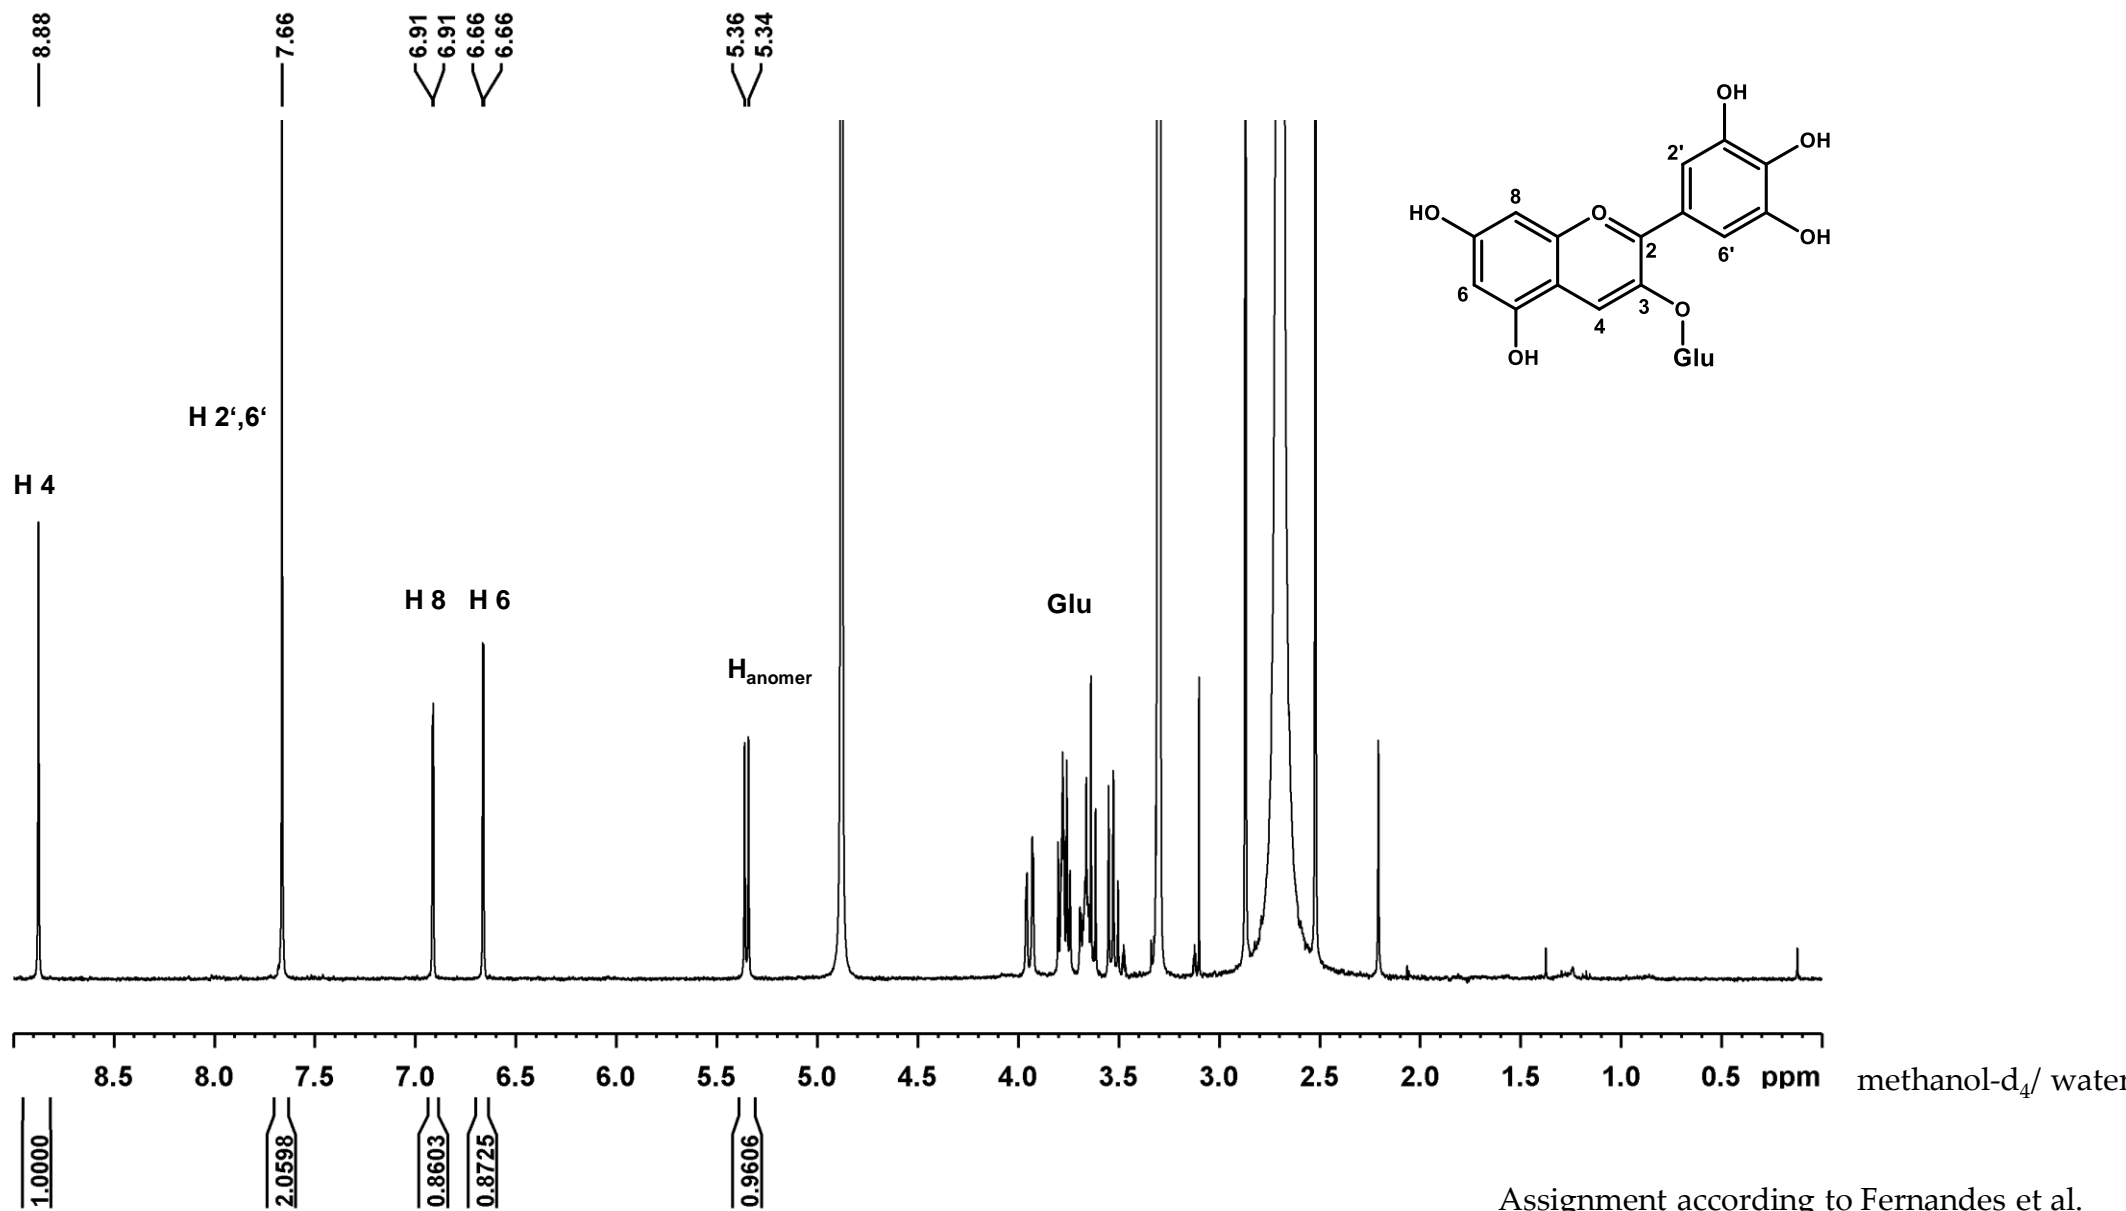

Assignment according to Fernandes et al. (2015). New Journal of Chemistry, 39, 2602.

# Supplemental material

**Table S2.** Mass concentration  $\gamma$  determined by q-NMR in acidic methanol/water (50/50, v/v) and potassium chloride buffer pH 1.

|             | Quantification       |                                               |                                             |                                                 |                                       |        |
|-------------|----------------------|-----------------------------------------------|---------------------------------------------|-------------------------------------------------|---------------------------------------|--------|
|             | by balance           |                                               | by q-NMR spectroscopy                       |                                                 |                                       |        |
|             | $\gamma$ /<br>(mg/L) | protons for quantification                    | $\gamma_{\text{methanol/water}}$<br>/(mg/L) | $\gamma_{\text{buffer}}$ /(mg/L) <sup>[b]</sup> | Difference between balance/NMR<br>[%] |        |
|             |                      |                                               |                                             |                                                 | methanol/water                        | buffer |
| Dpd-3-glc 1 | 1522                 | H 4; H 2',6'; H 8; H6;<br>H <sub>anomer</sub> | 1408                                        | 1120                                            | 93                                    | 74     |
| Dpd-3-glc 2 | 979                  | H 4; H 2',6'; H 8; H6;<br>H <sub>anomer</sub> | 885                                         | 733                                             | 90                                    | 75     |
| Dpd-3-glc 1 | 1522                 | H 4; H 2',6'                                  | 1520                                        | 1145                                            | 100                                   | 75     |
| Dpd-3-glc 2 | 979                  | H 4; H 2',6'                                  | 937                                         | 778                                             | 96                                    | 79     |

# Supplemental material

**Figure S2.** Proton spectra recorded at a 400 MHz Spectrometer and used for quantification including signal assignment based on literature and own 2D NMR spectra in methanol-d<sub>4</sub>/ D<sub>2</sub>O

# gallic acid

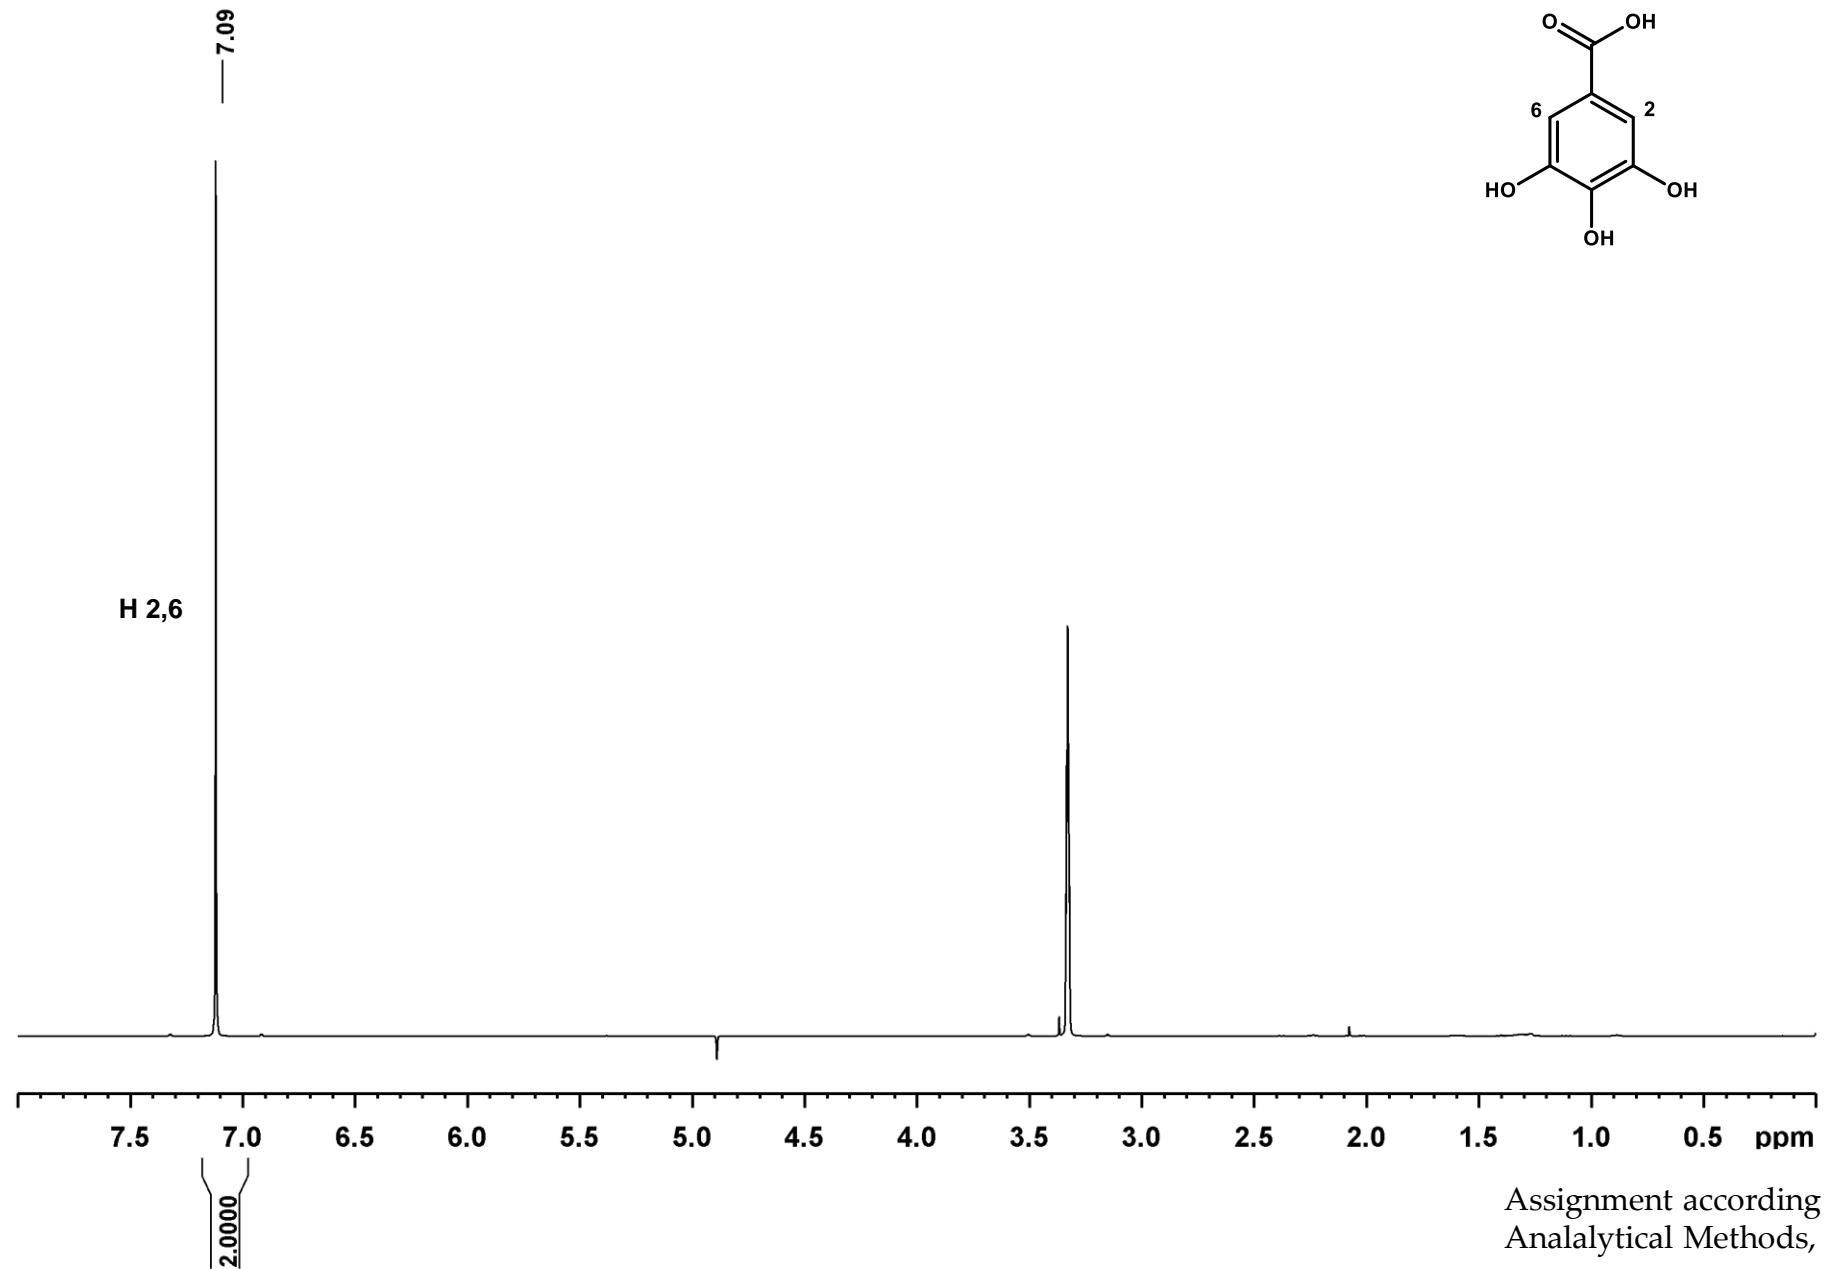

Assignment according to Yuan et al. (2014).  
Analytical Methods, 6, 907-914.

# *trans*-ferulic acid

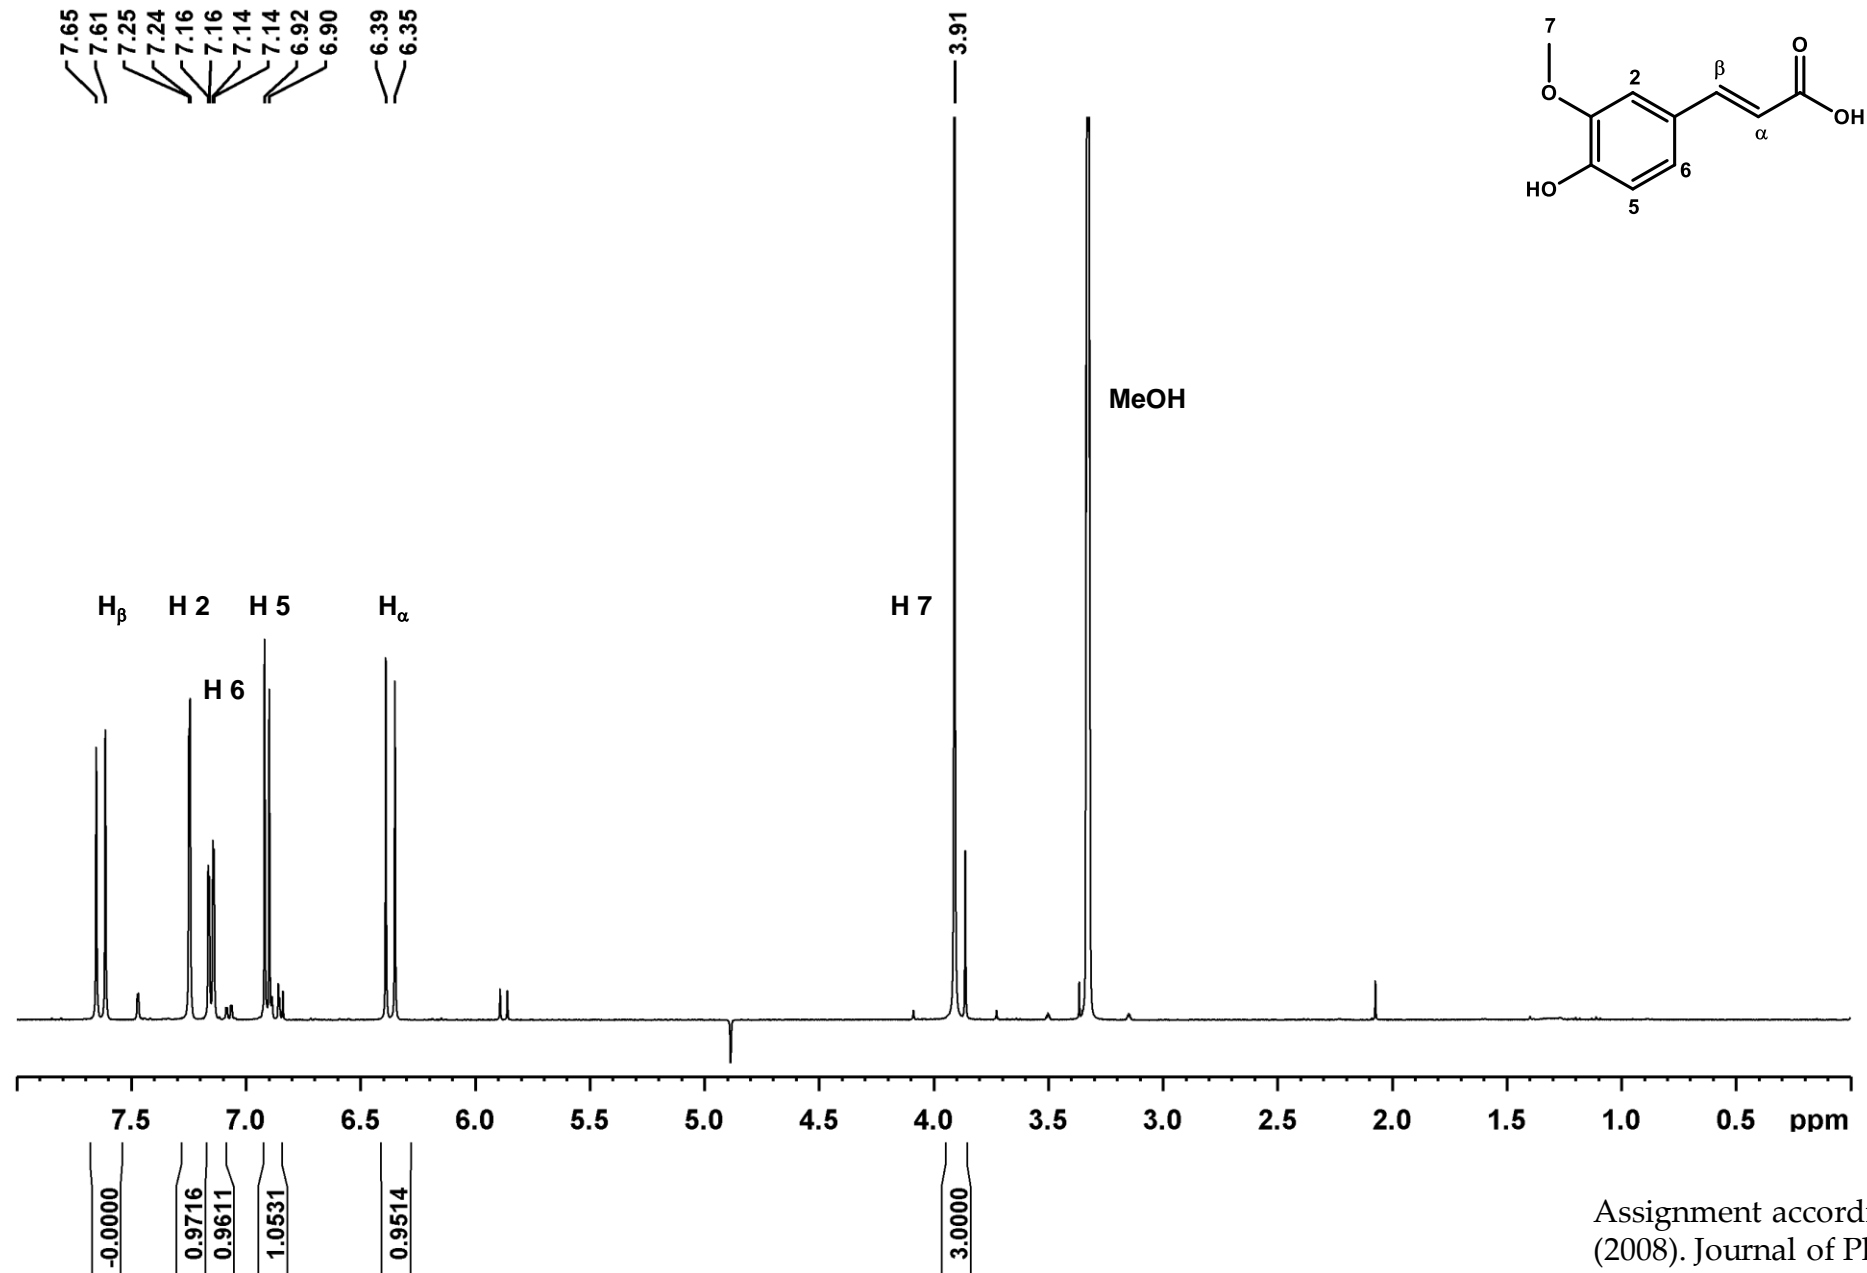

Assignment according to Anselmi et al. (2008). Journal of Pharmaceutical and Biomedical Analysis 46, 4, 645-652.

*trans*-caffeic acid

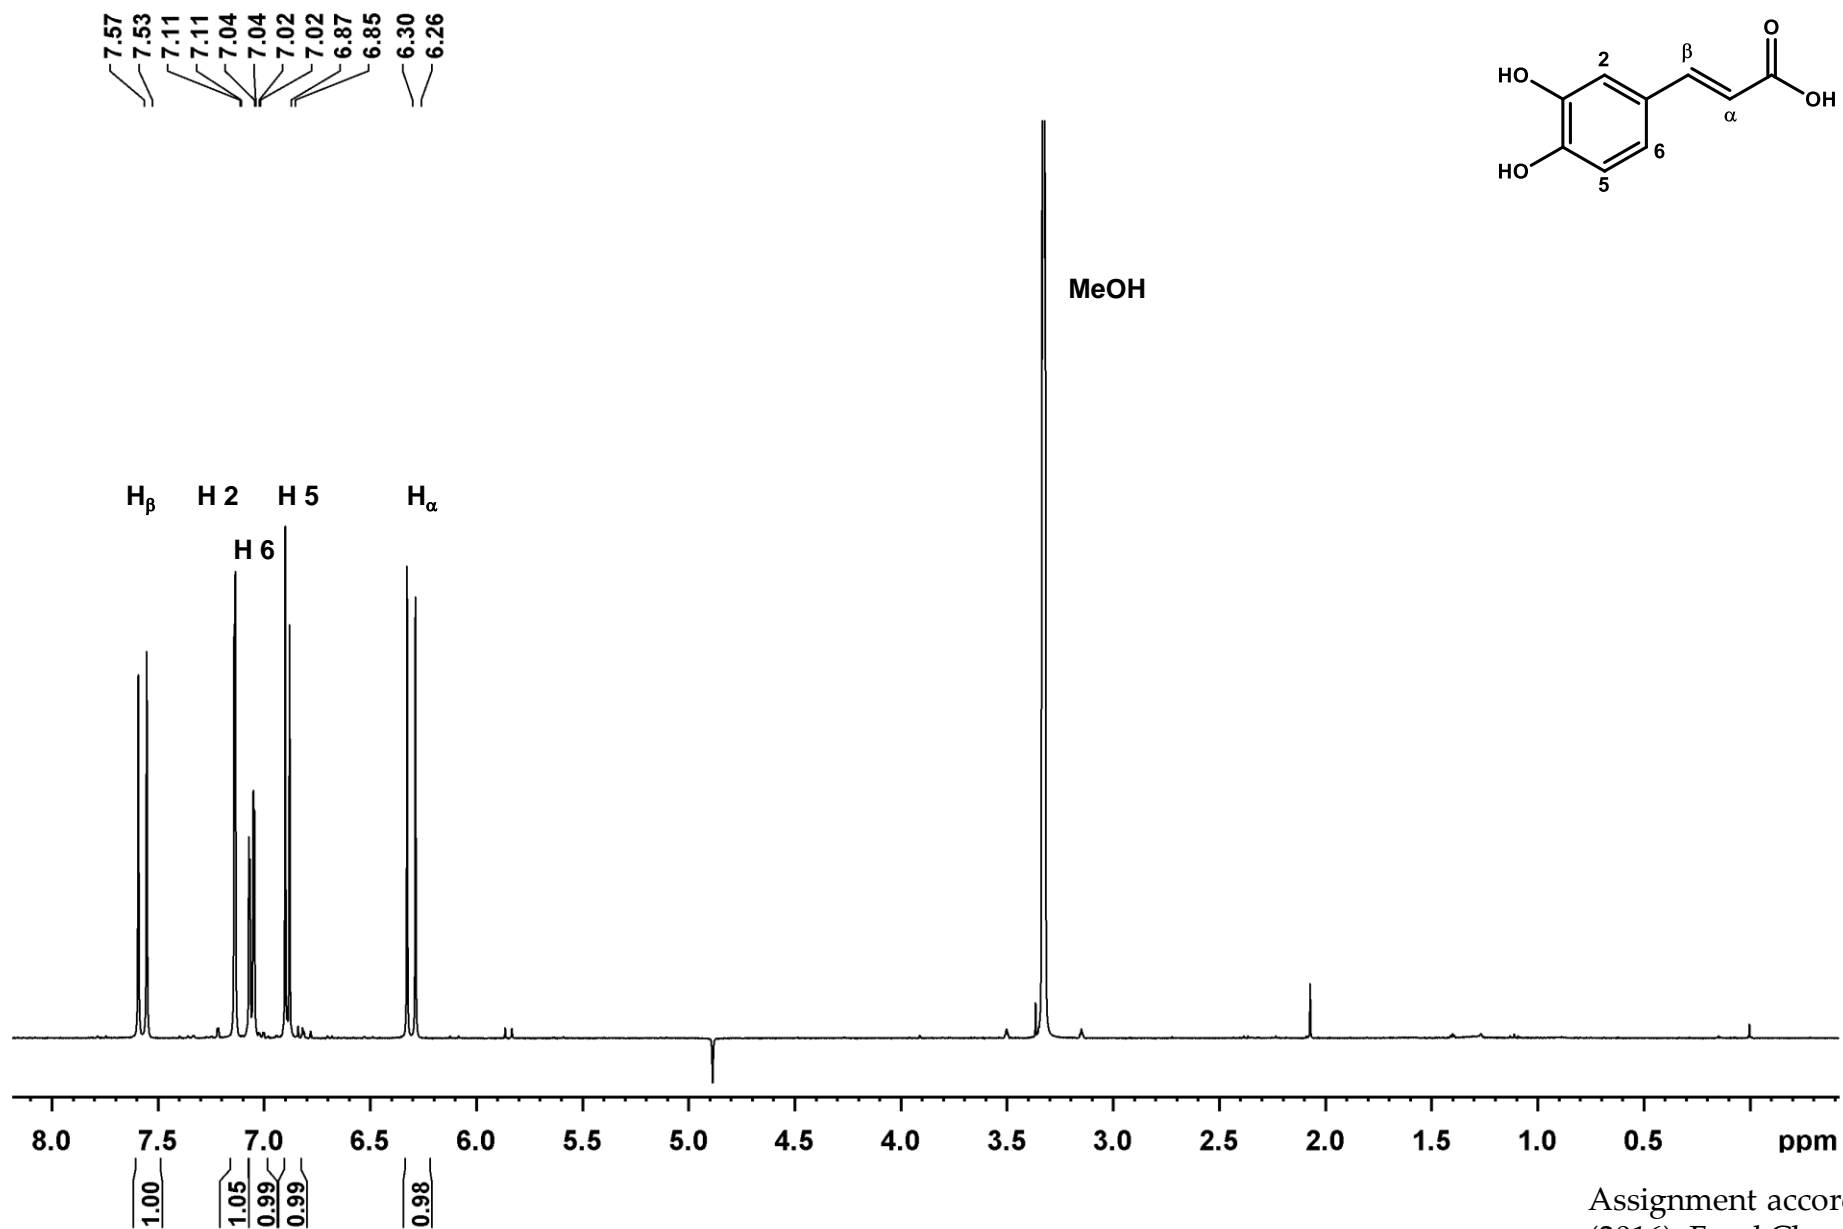

Assignment according to Forino et al.  
(2016). Food Chemistry, 194, 1254-1259.

*trans*-coumaric acid

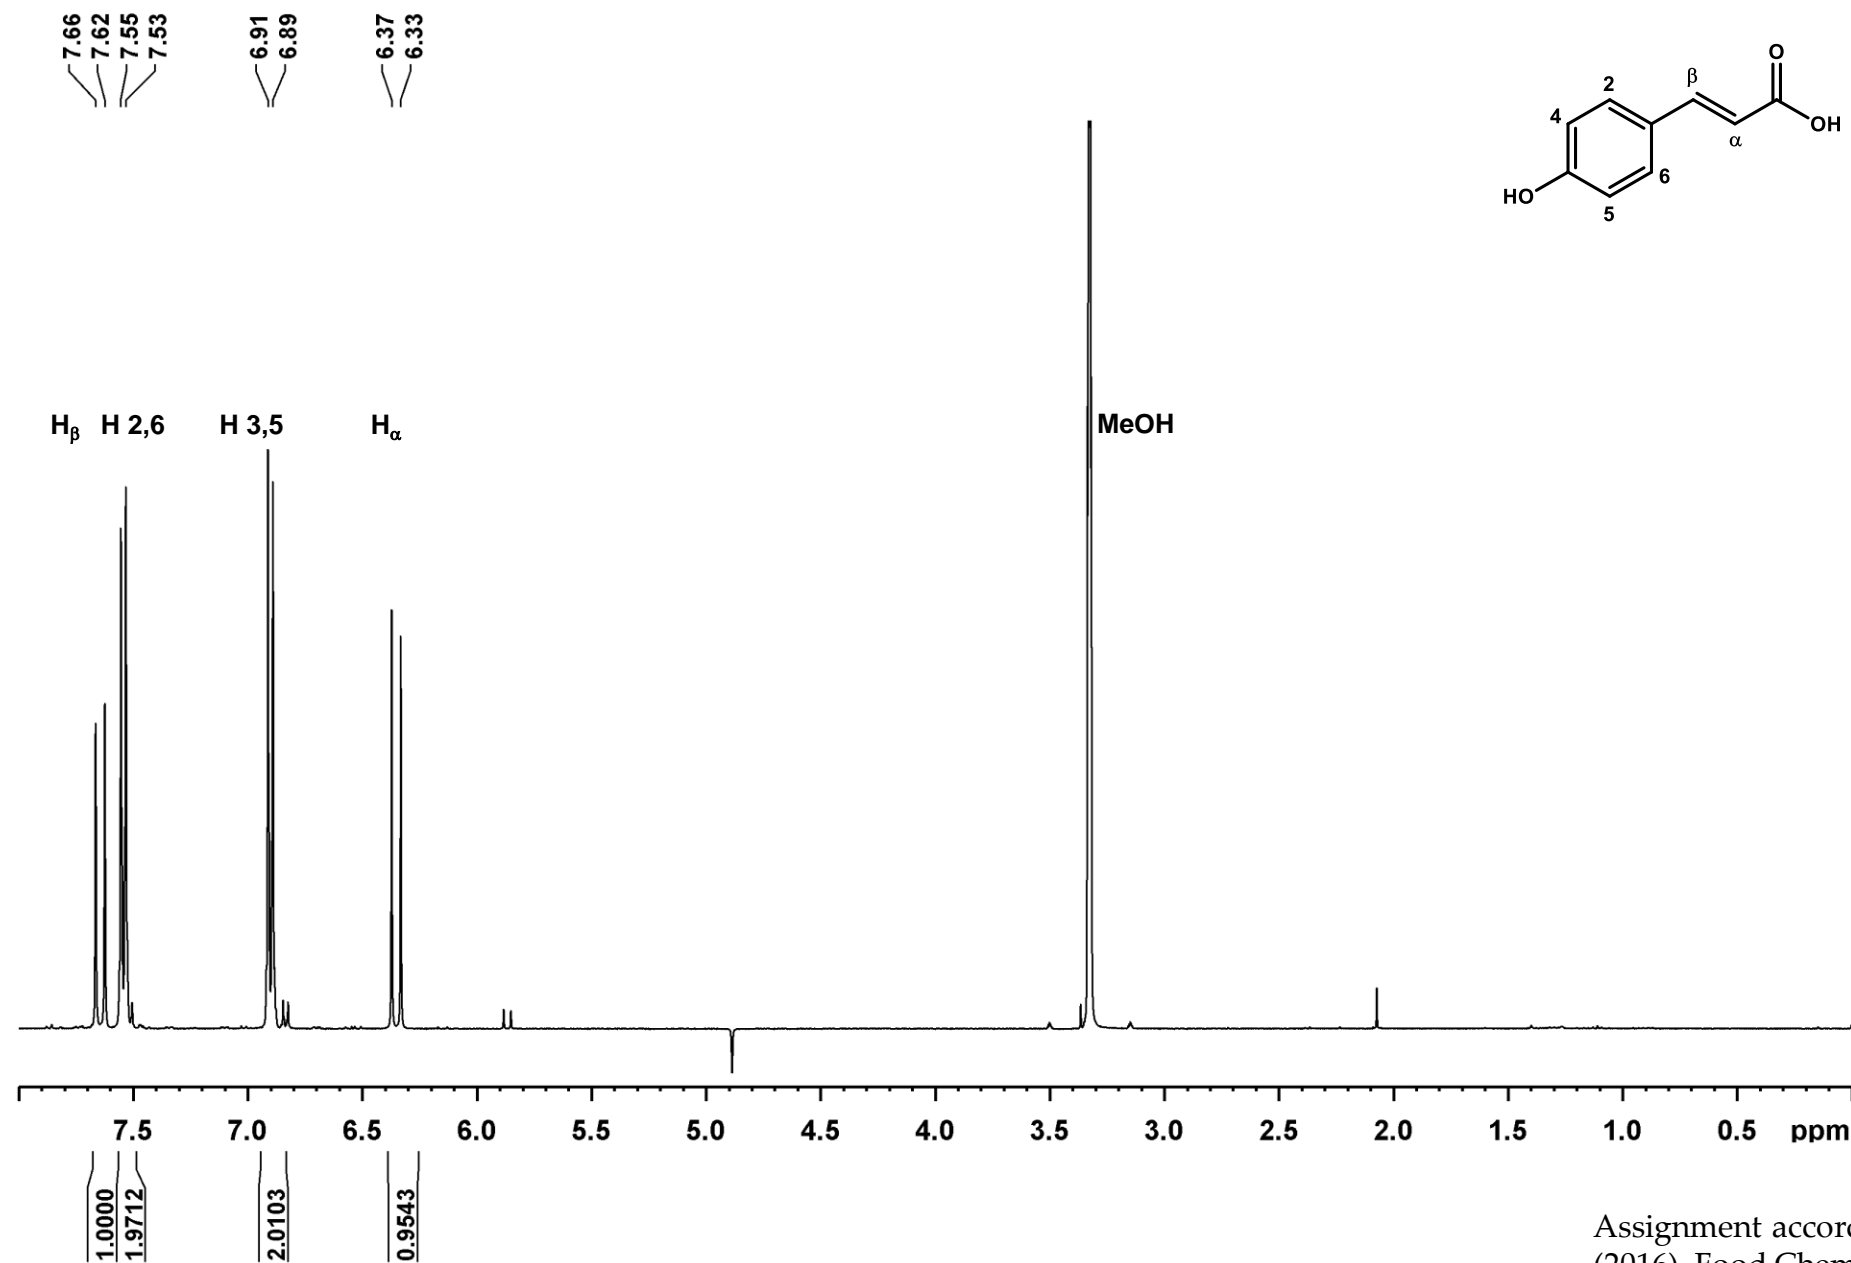

Assignment according to Forino et al.  
(2016). Food Chemistry, 194, 1254-1259.



*trans*-sinapinic acid

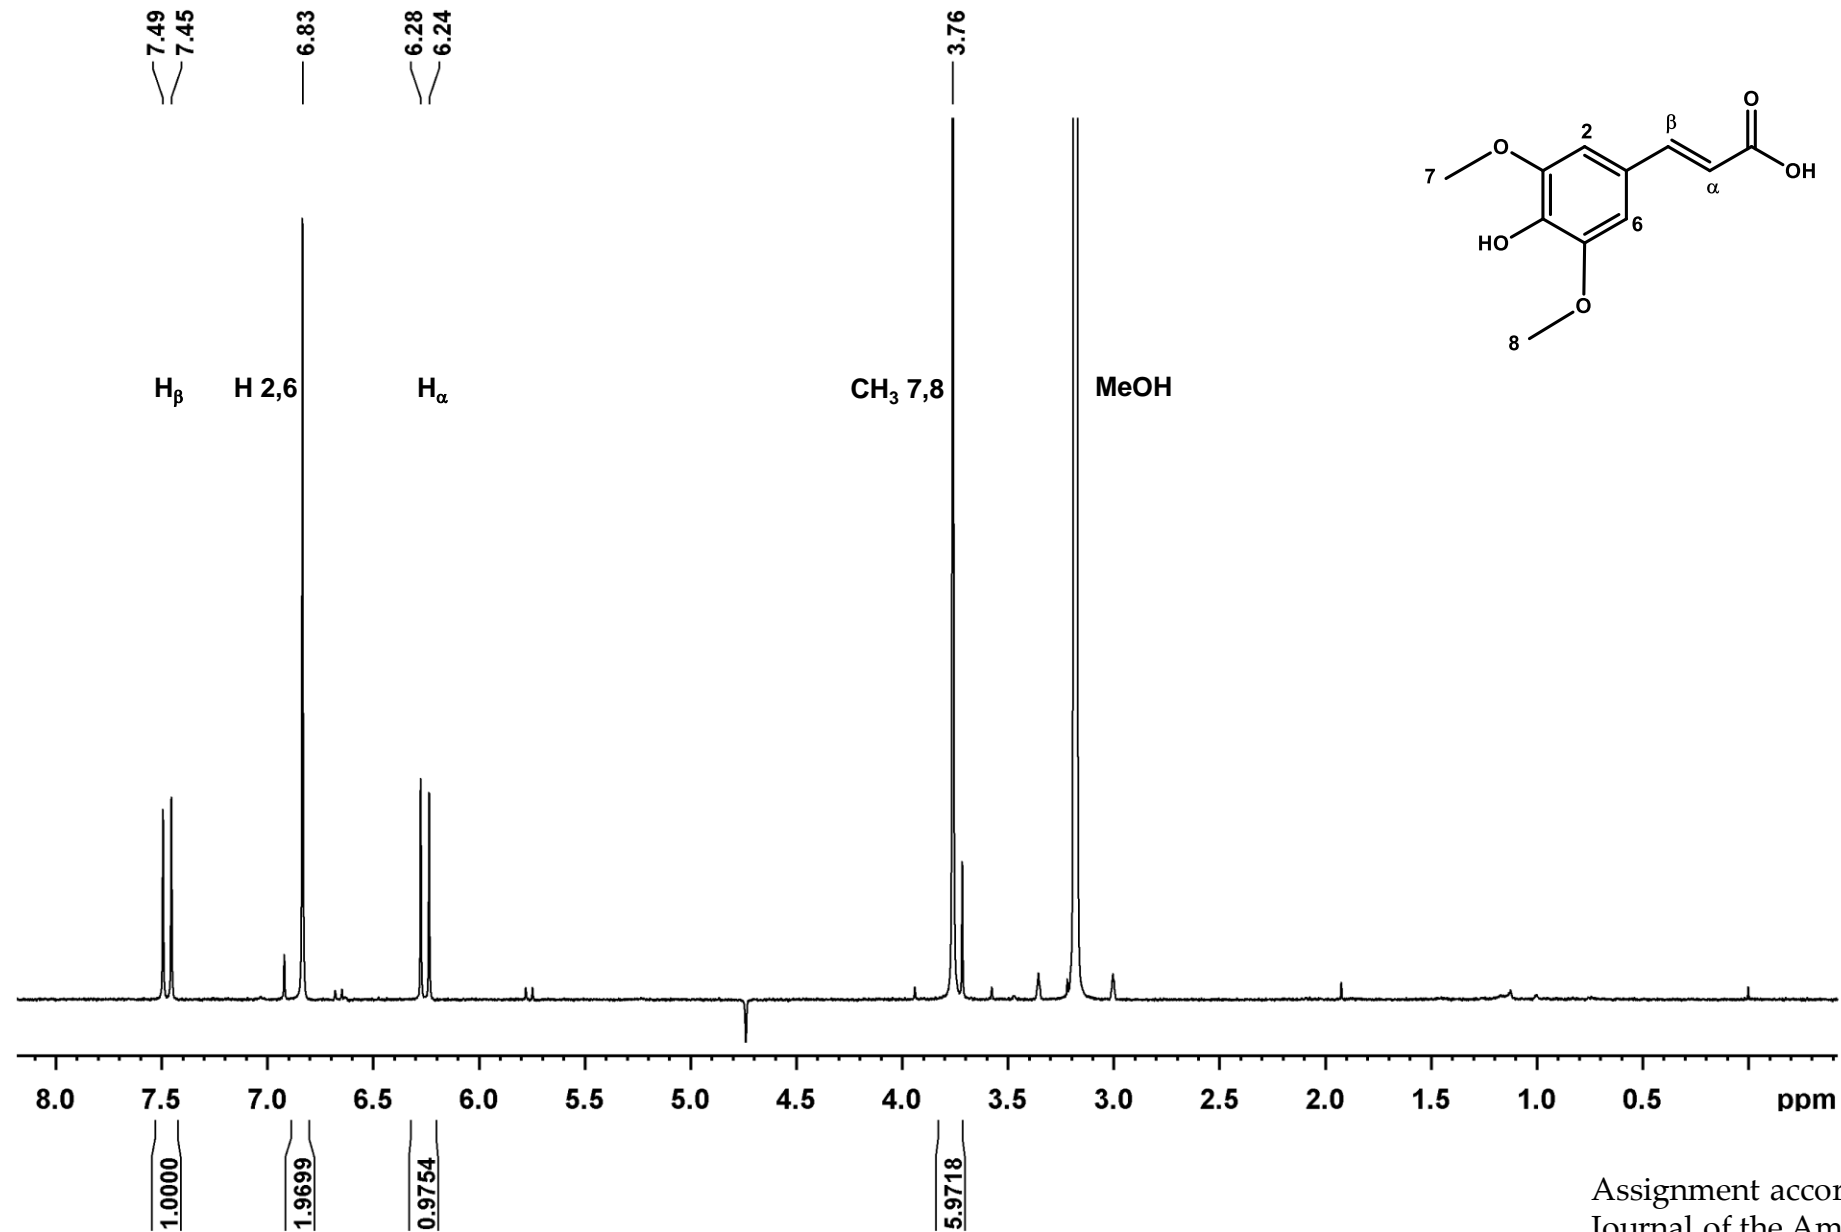

Assignment according to Cai et al. (1999)  
Journal of the American Oil Chemists, 76,  
4, 433-441.

# chlorogenic acid

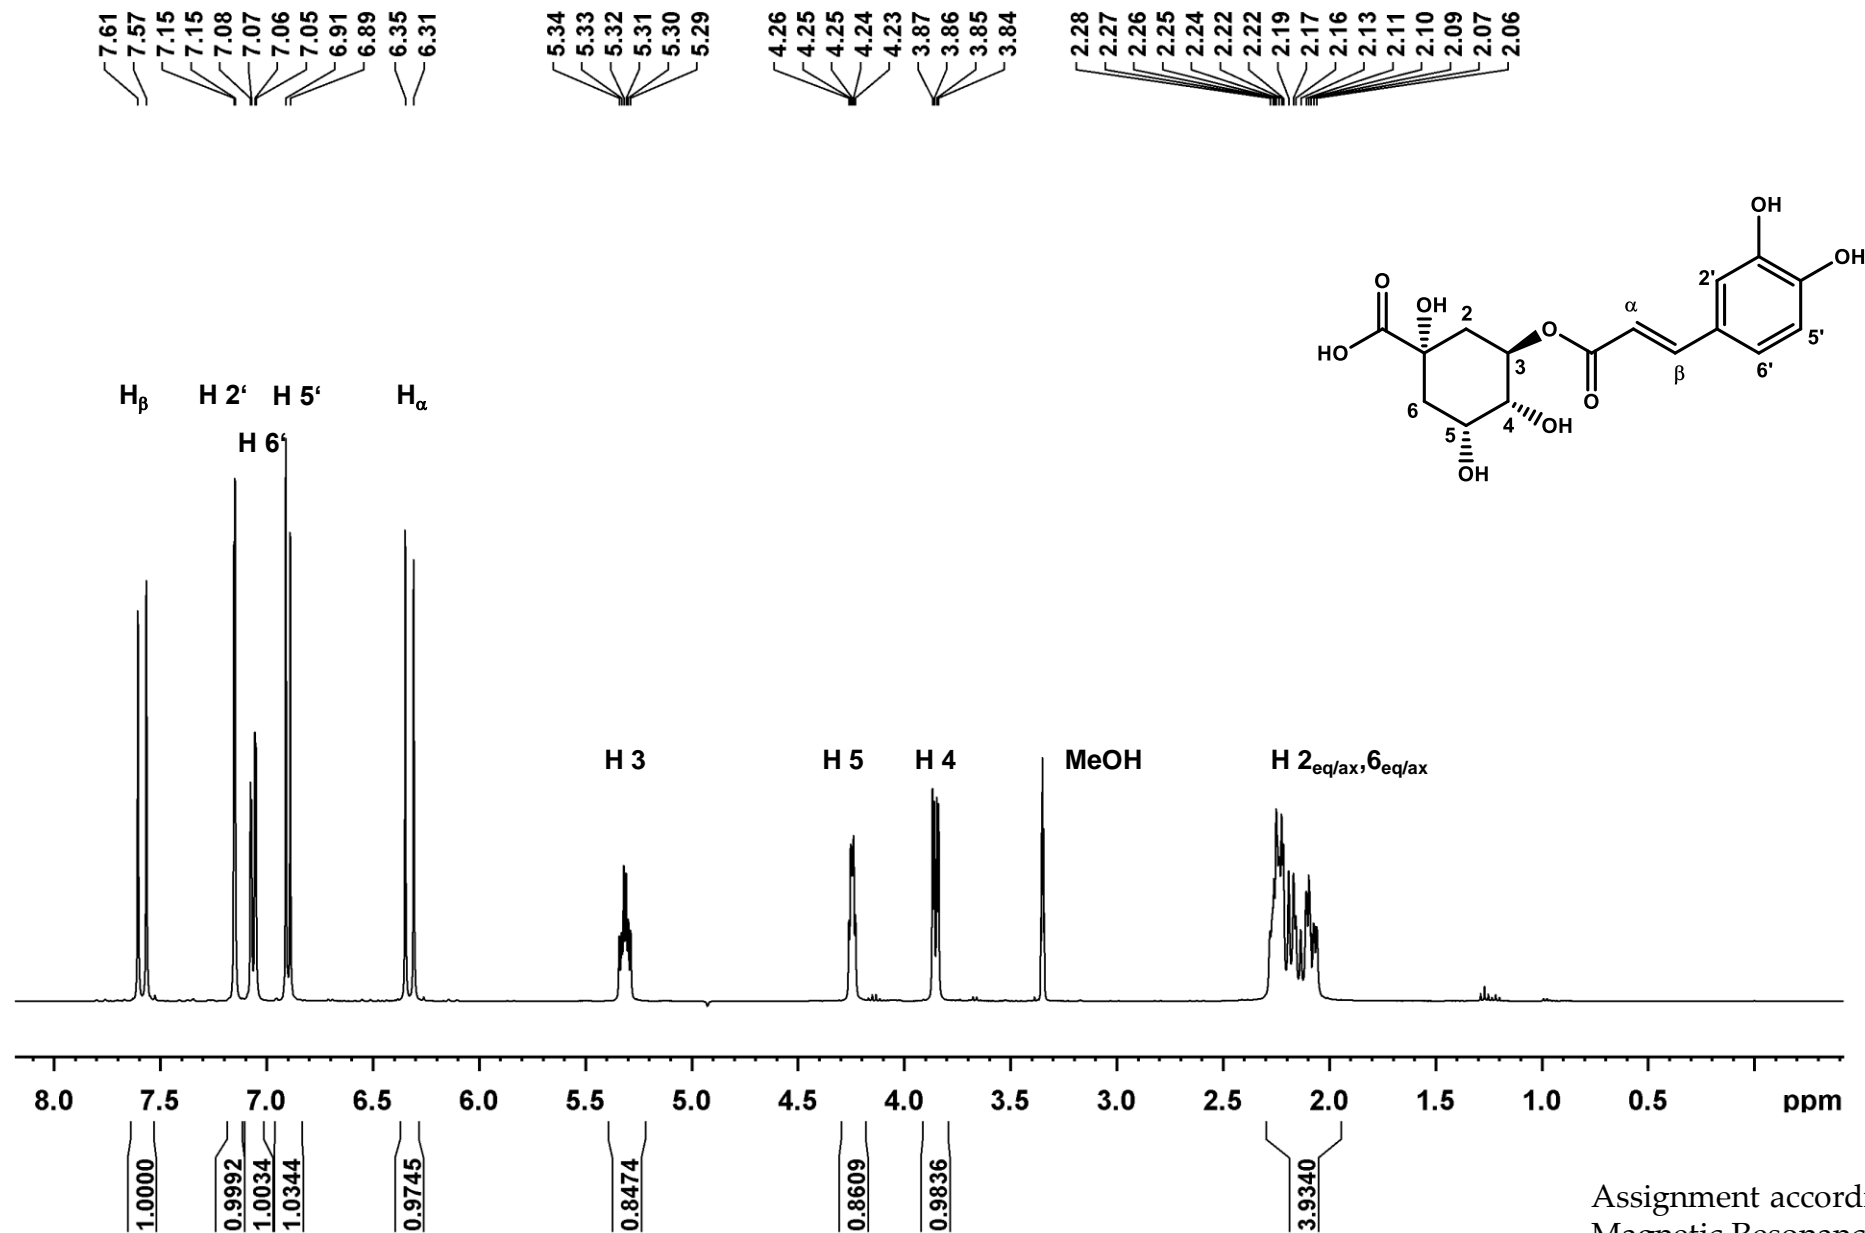

Assignment according to Pauli et al. (1999).  
Magnetic Resonance in Chemistry. Chem.  
37, 11, 827-836.

cryptochlorogenic acid

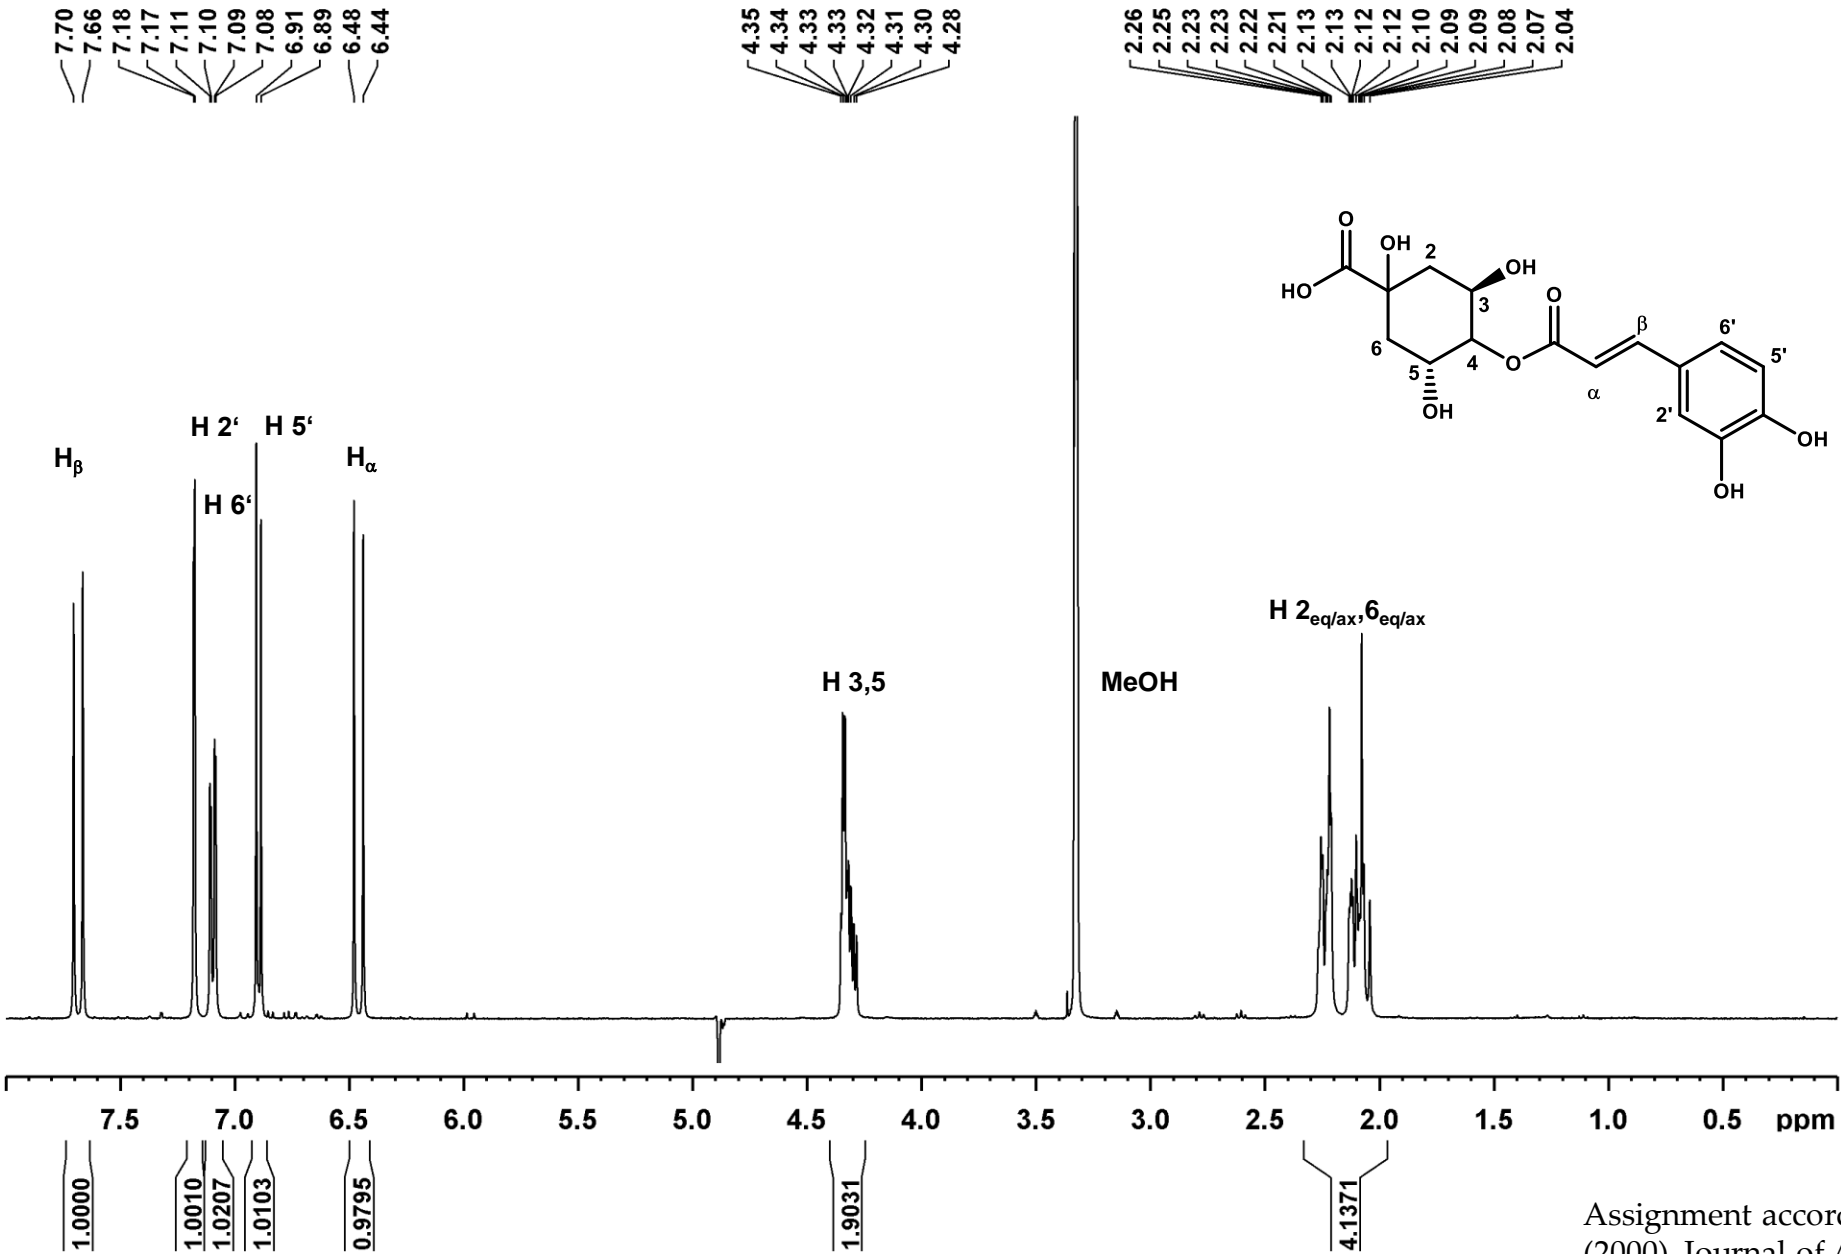

Assignment according to Nakatani et al. (2000). Journal of Agricultural and Food Chemistry, 48, 5512-5516.

# neochlorogenic acid

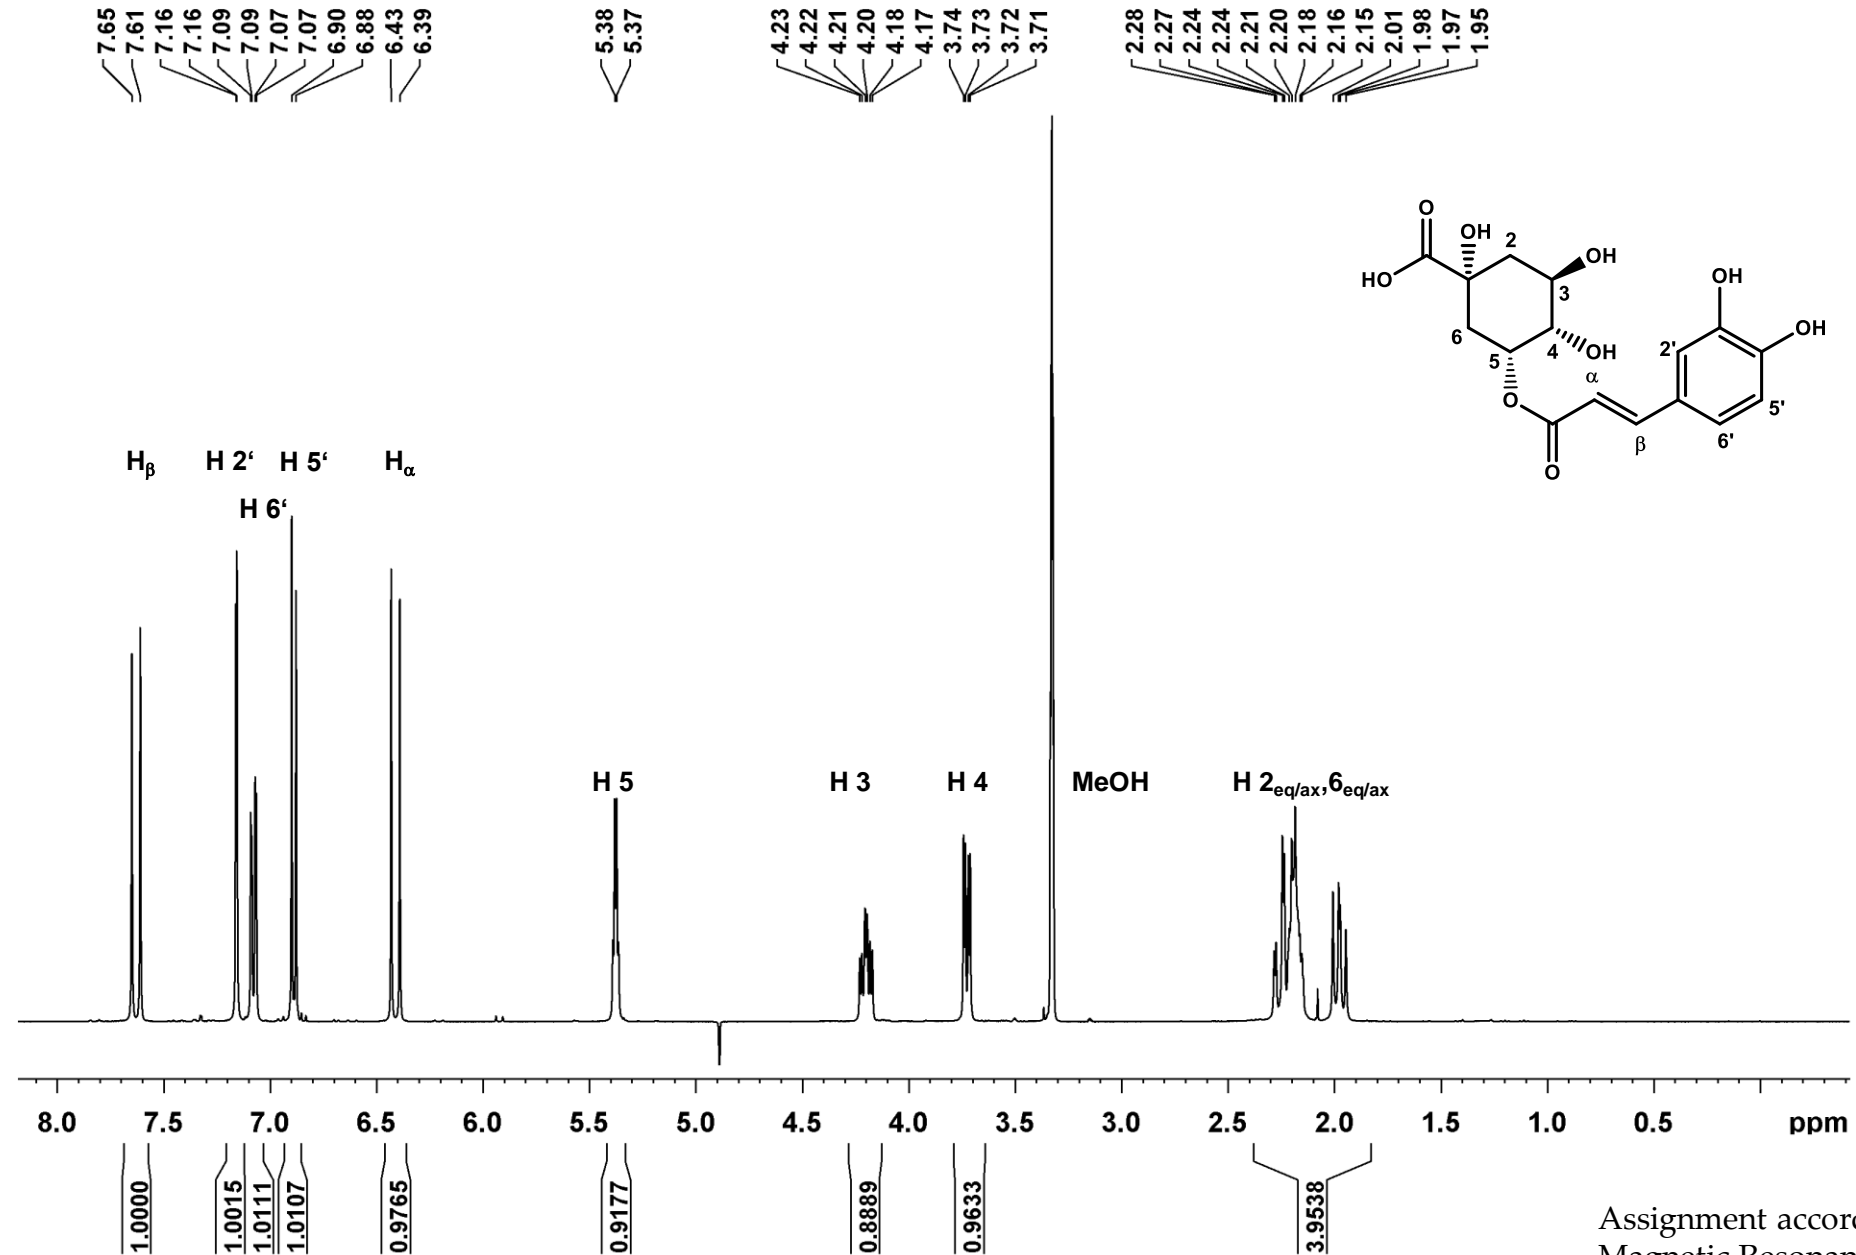

Assignment according to Pauli et al. (1999).  
Magnetic Resonance in Chemistry. Chem.  
37, 11, 827-836.

4,5-dicaffeoylquinic acid

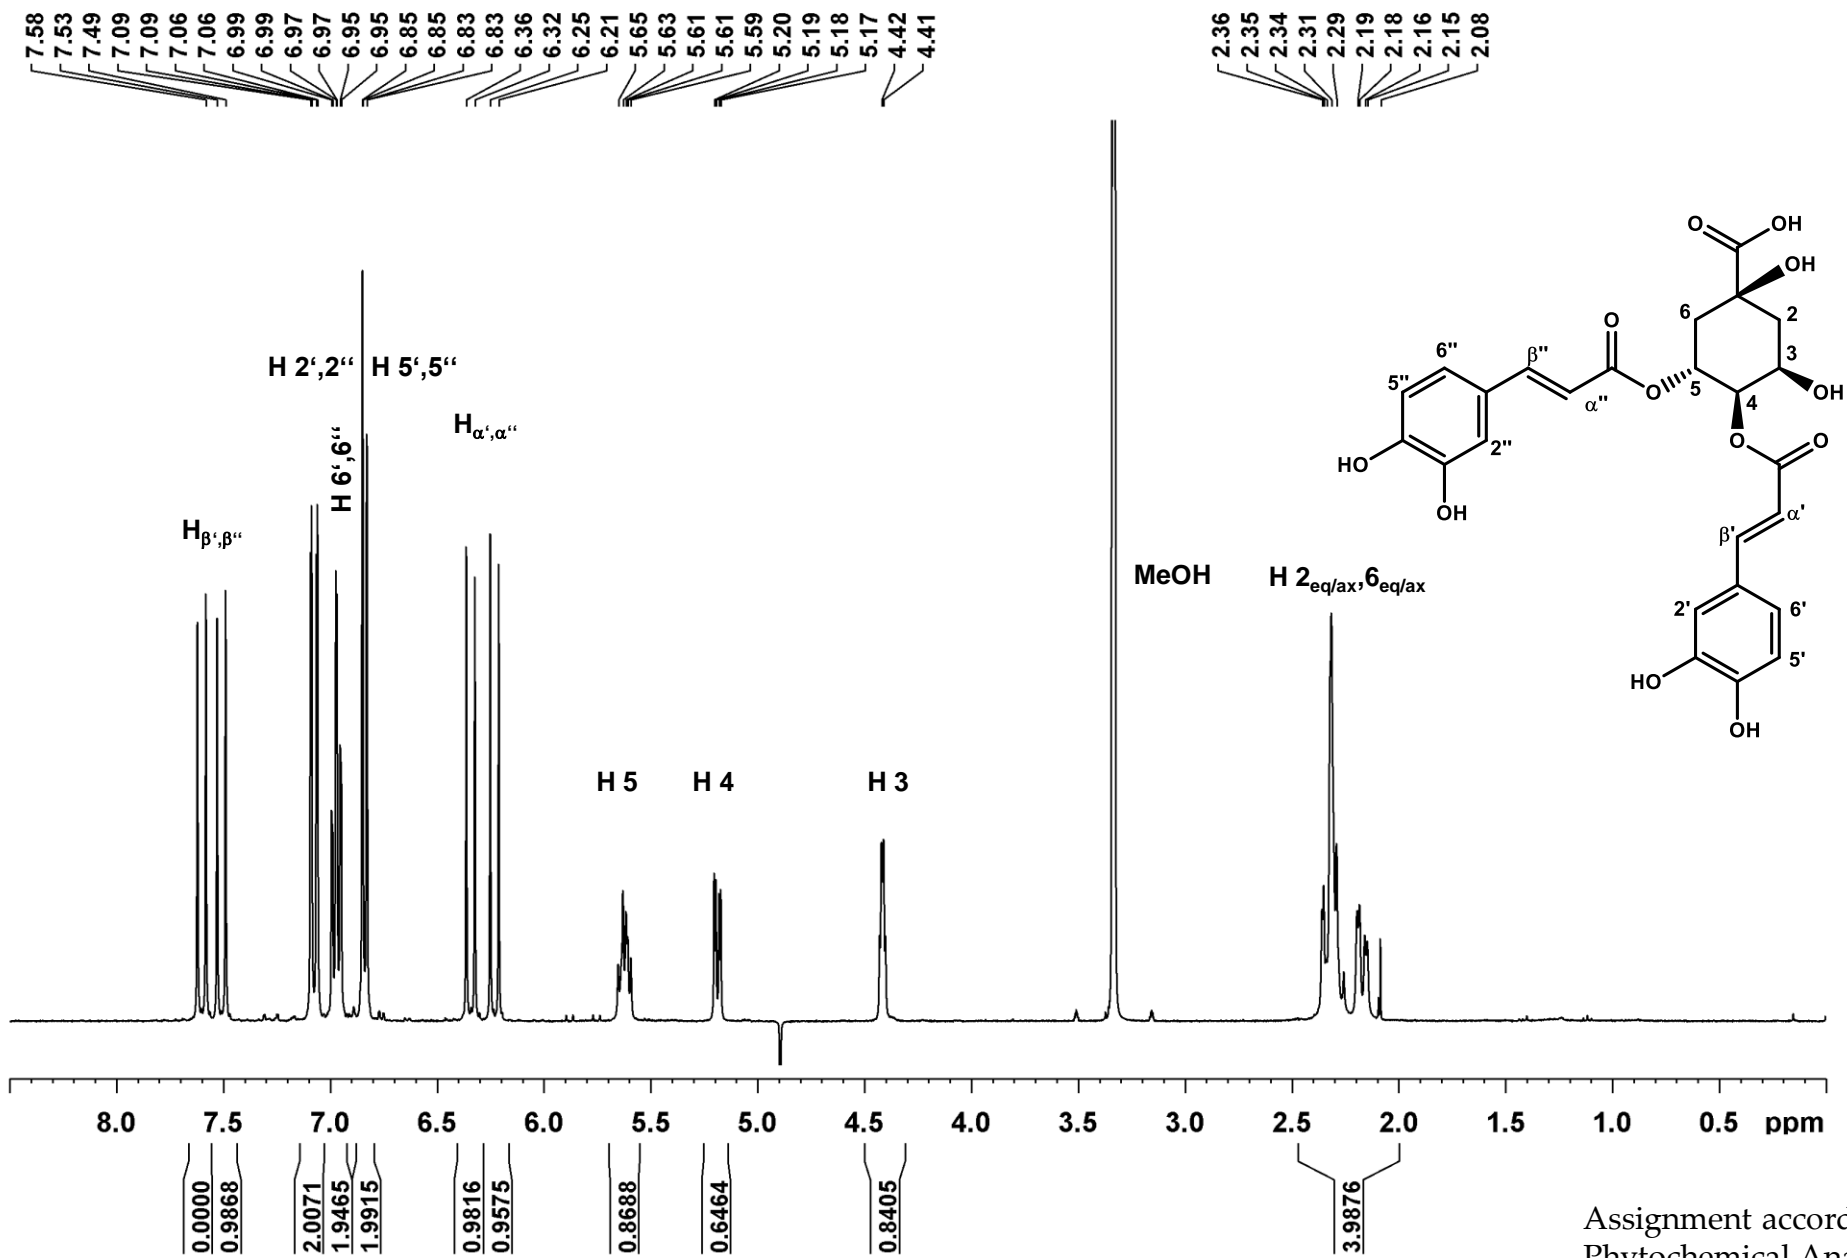

Assignment according to Wu et al. (2007).  
Phytochemical Analysis, 18, 5, 401-410.

# (+)-catechin

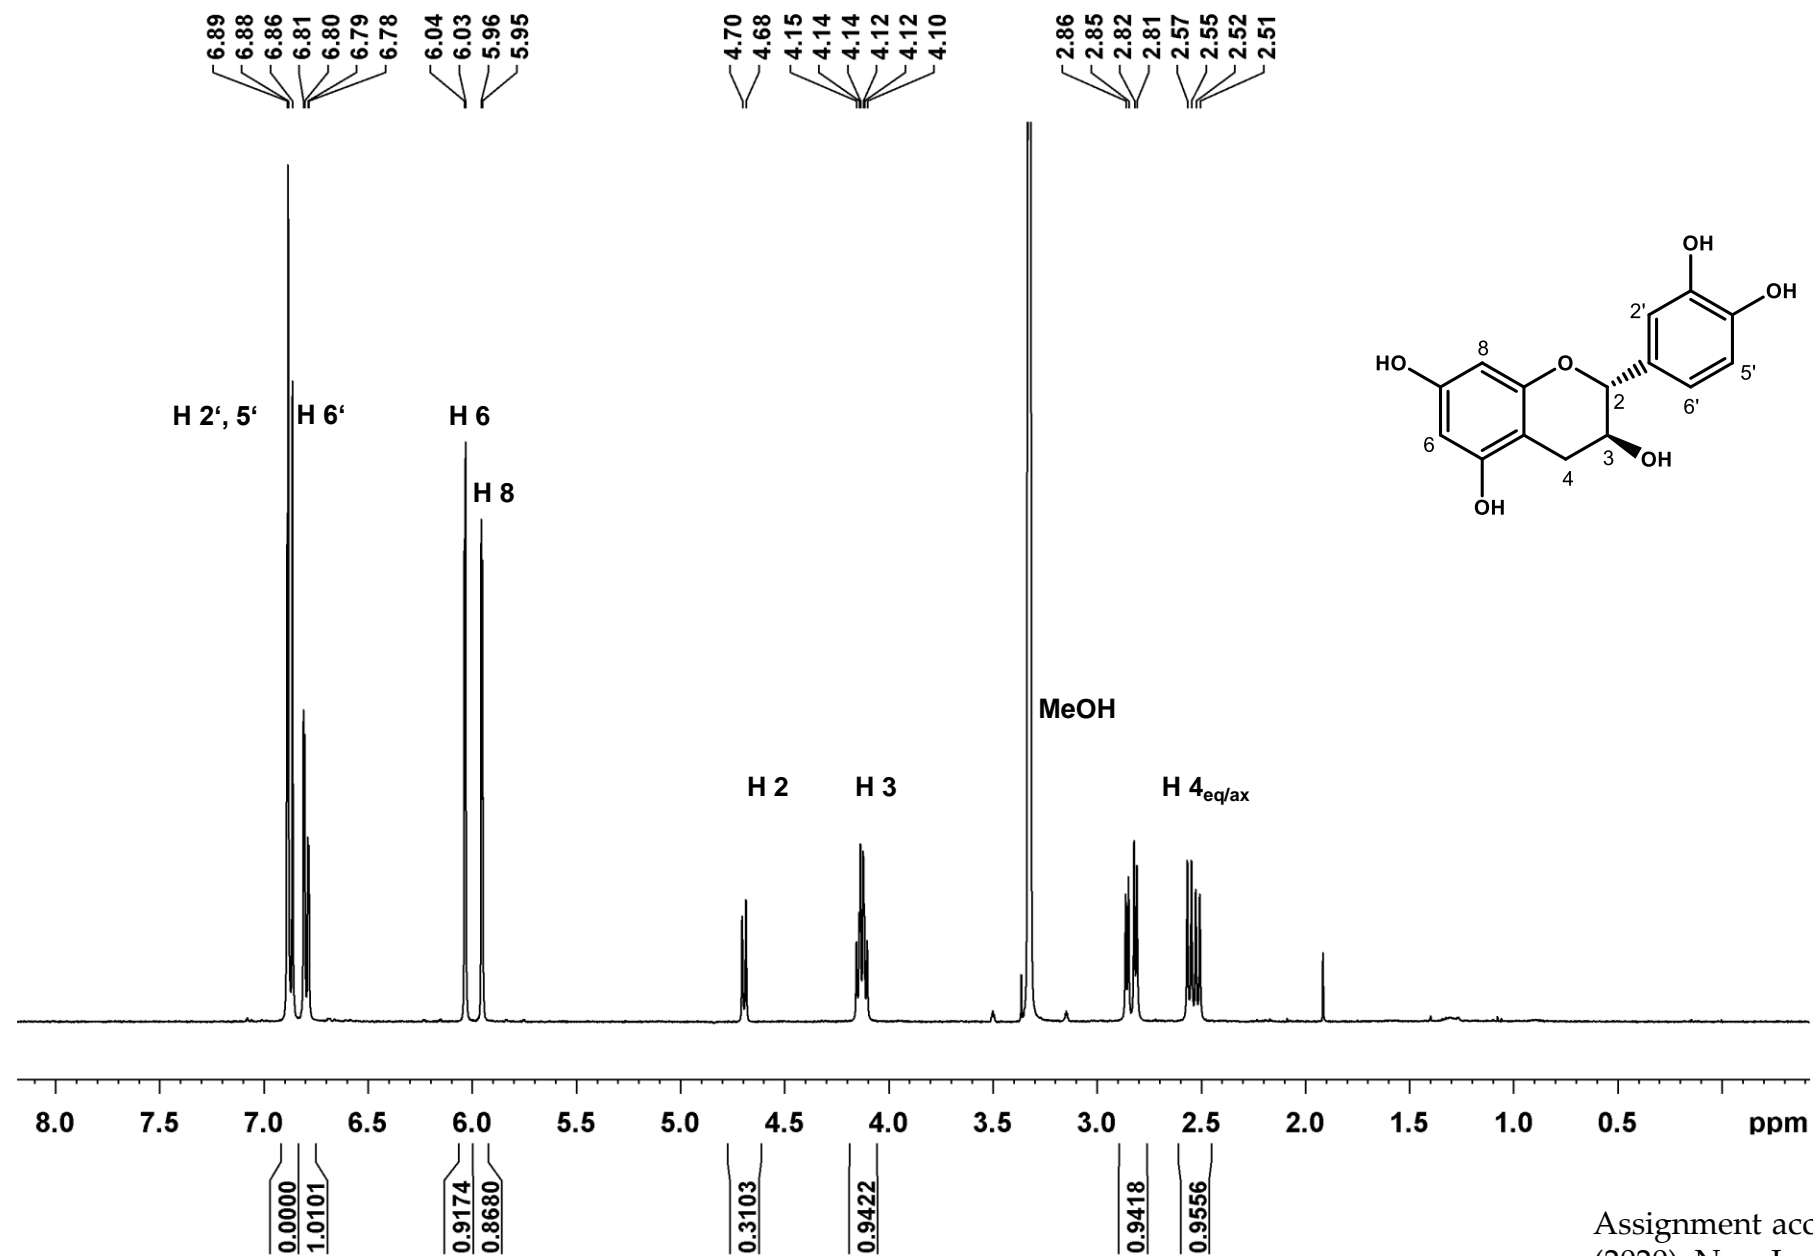

Assignment according to da Silva et al. (2020). New Journal of Chemistry, 44, 17391-17404.

# (-)-epicatechin

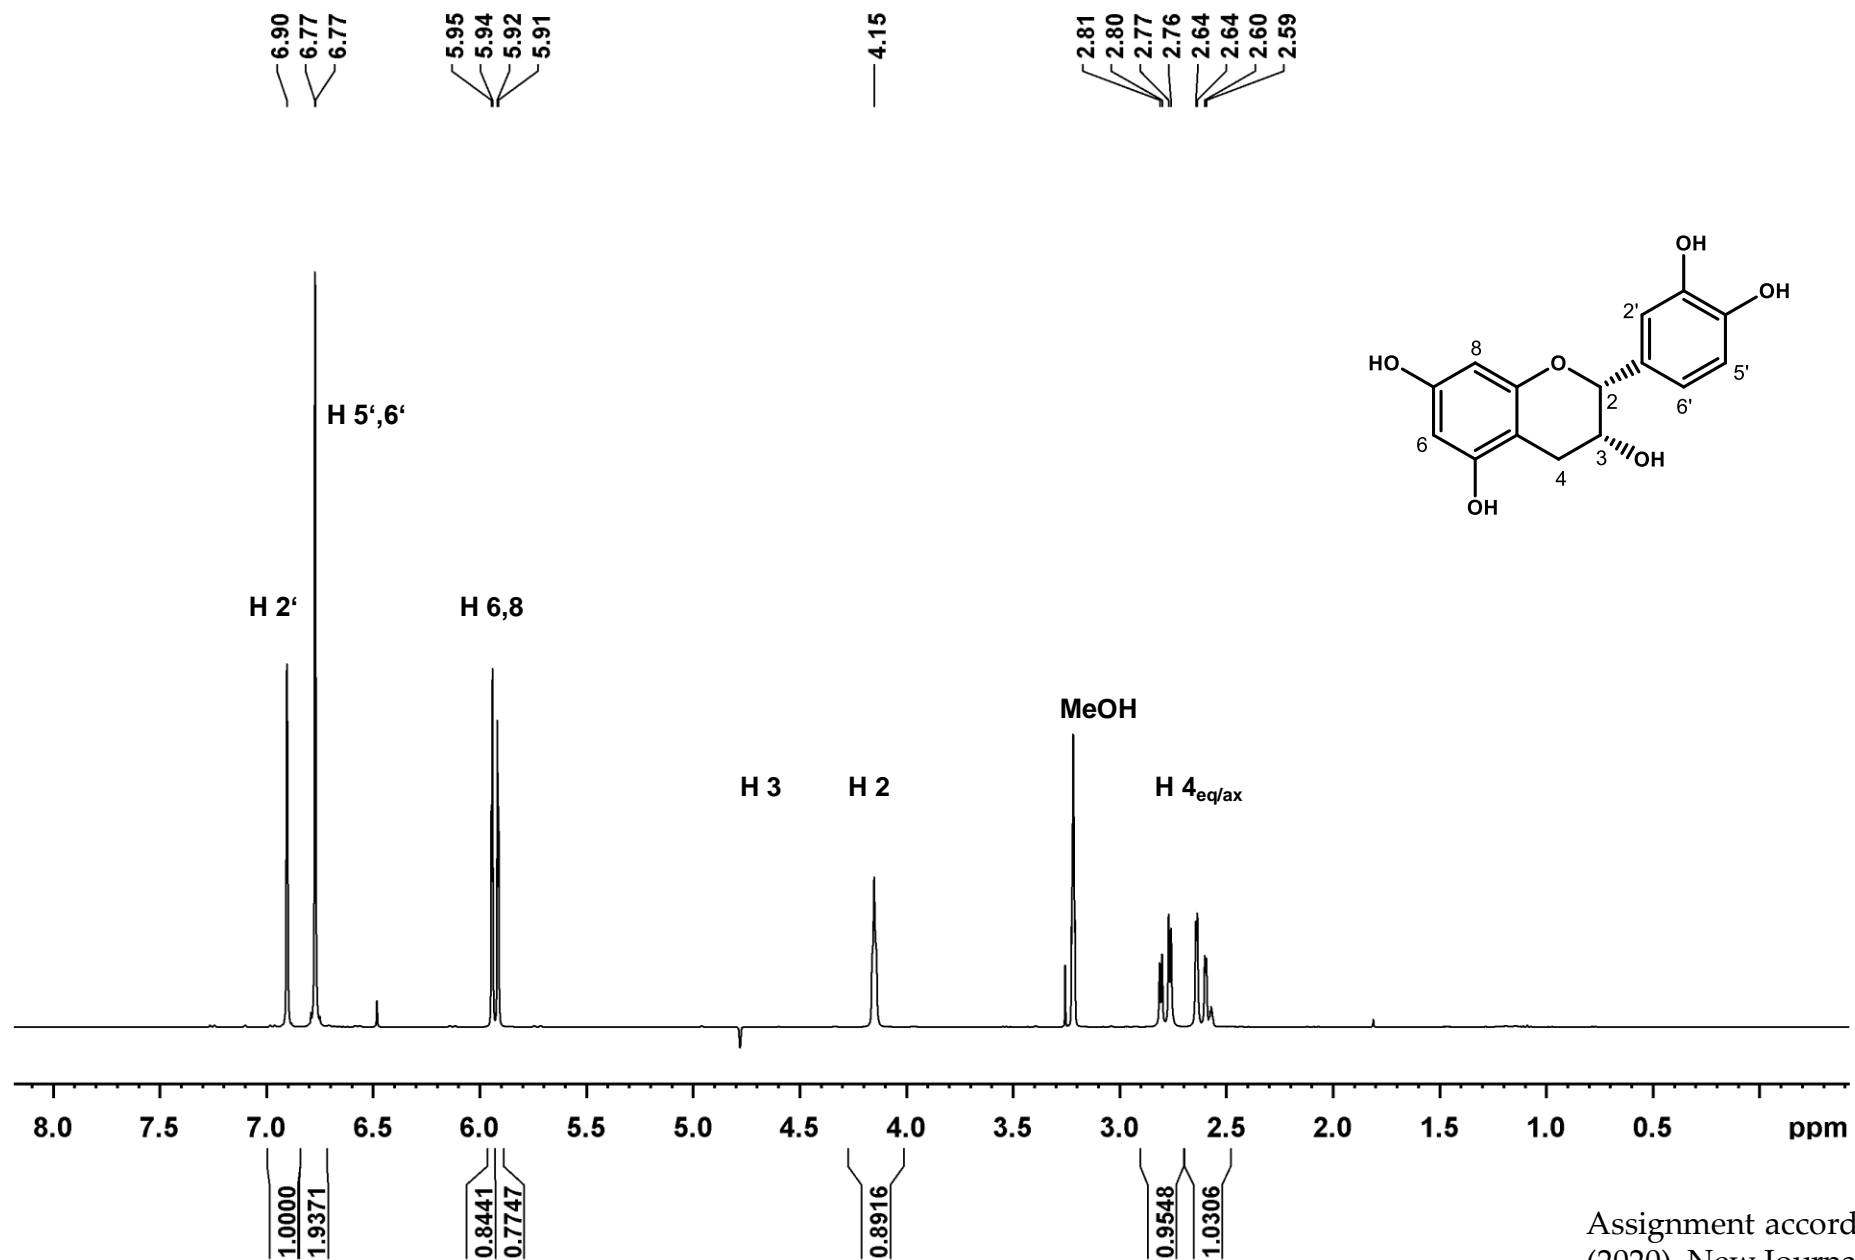

Assignment according to da Silva et al. (2020). New Journal of Chemistry, 44, 17391-17404.

procyanidin B1

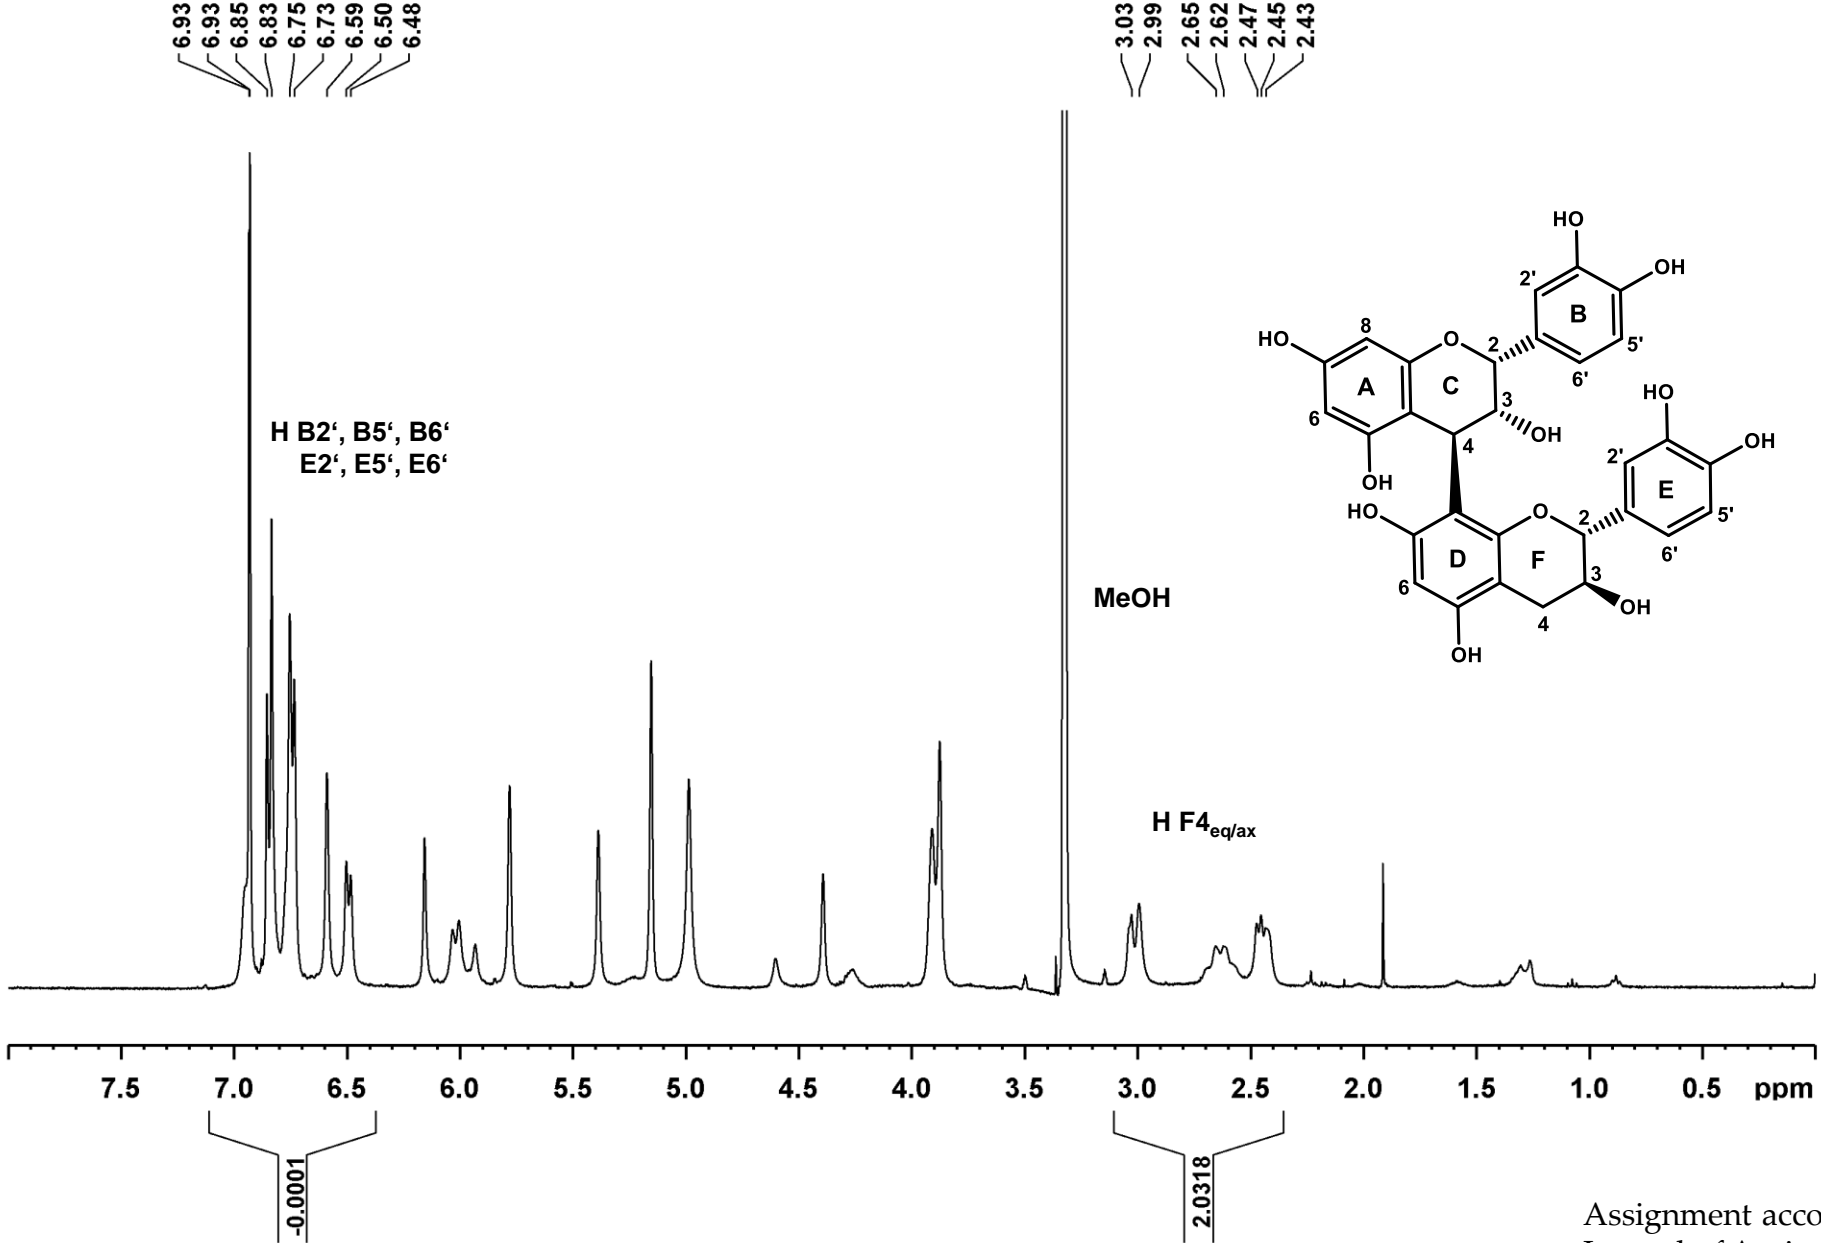

Assignment according to Shoji et al. (2003).  
Journal of Agricultural and Food  
Chemistry, 51, 3806-3813.



procyanidin B2

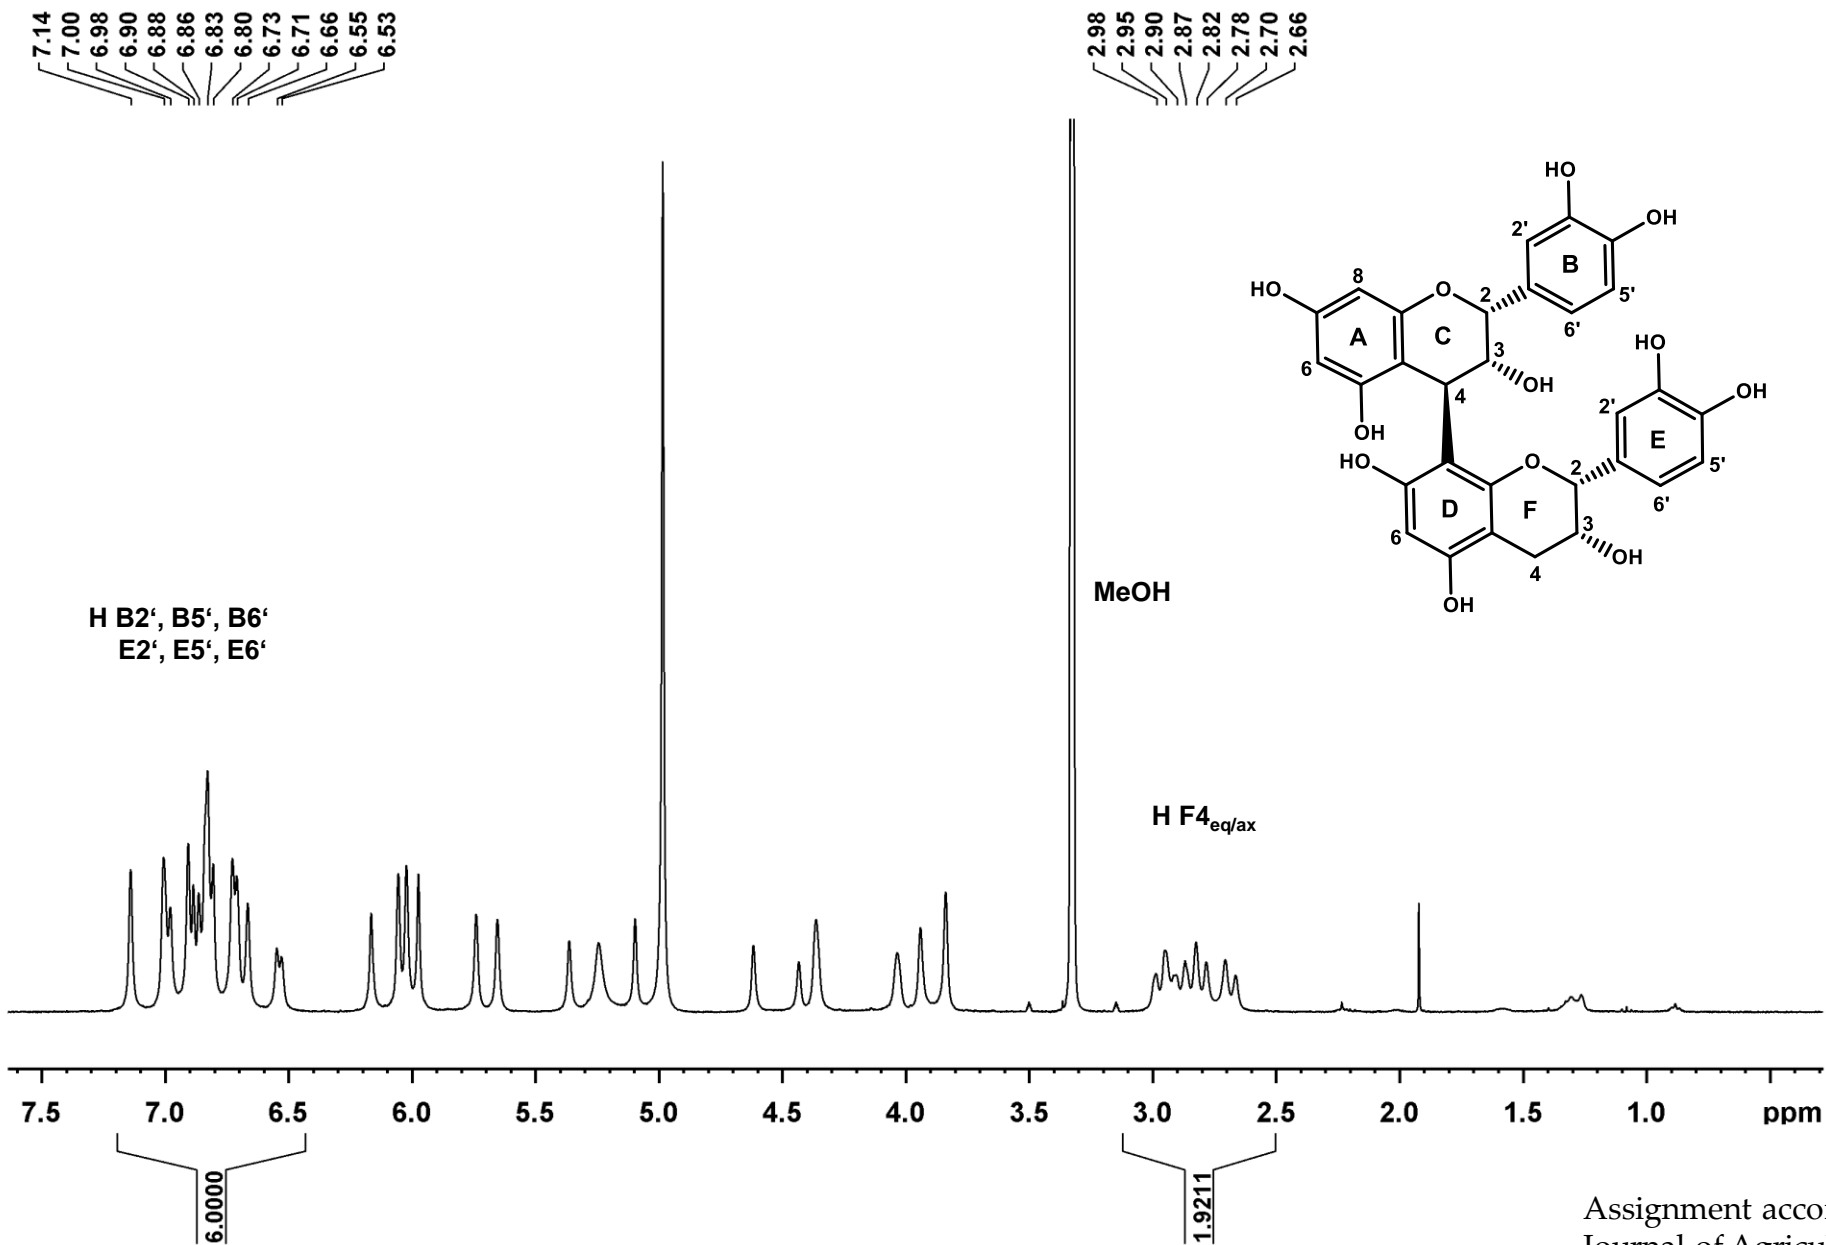

Assignment according to Shoji et al. (2003).  
Journal of Agricultural and Food  
Chemistry, 51, 3806-3813.

# procyanidin C1

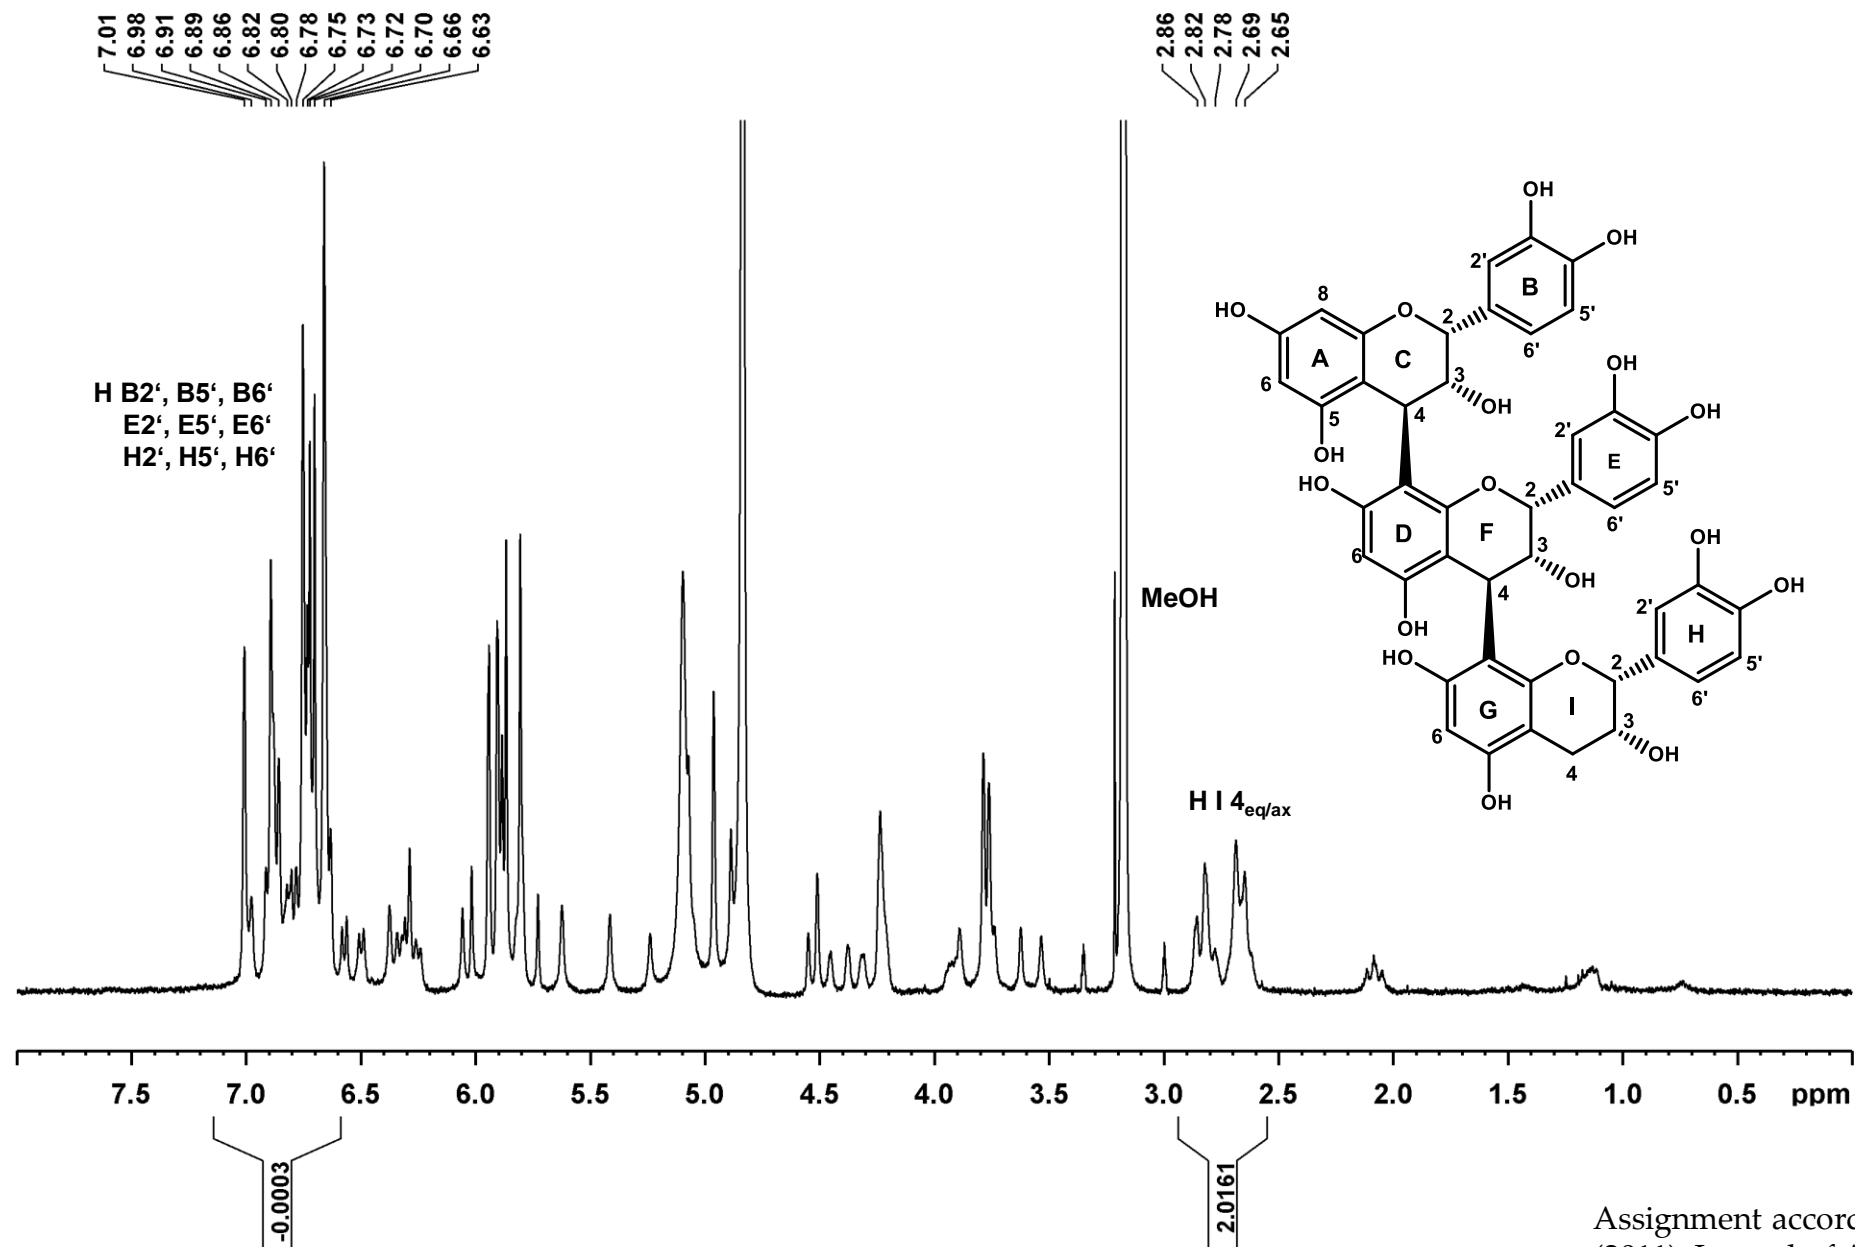

Assignment according to Esatbeyoglu et al. (2011). Journal of Agricultural and Food Chemistry, 59, 62–69.

quercetin-3-O-glucoside

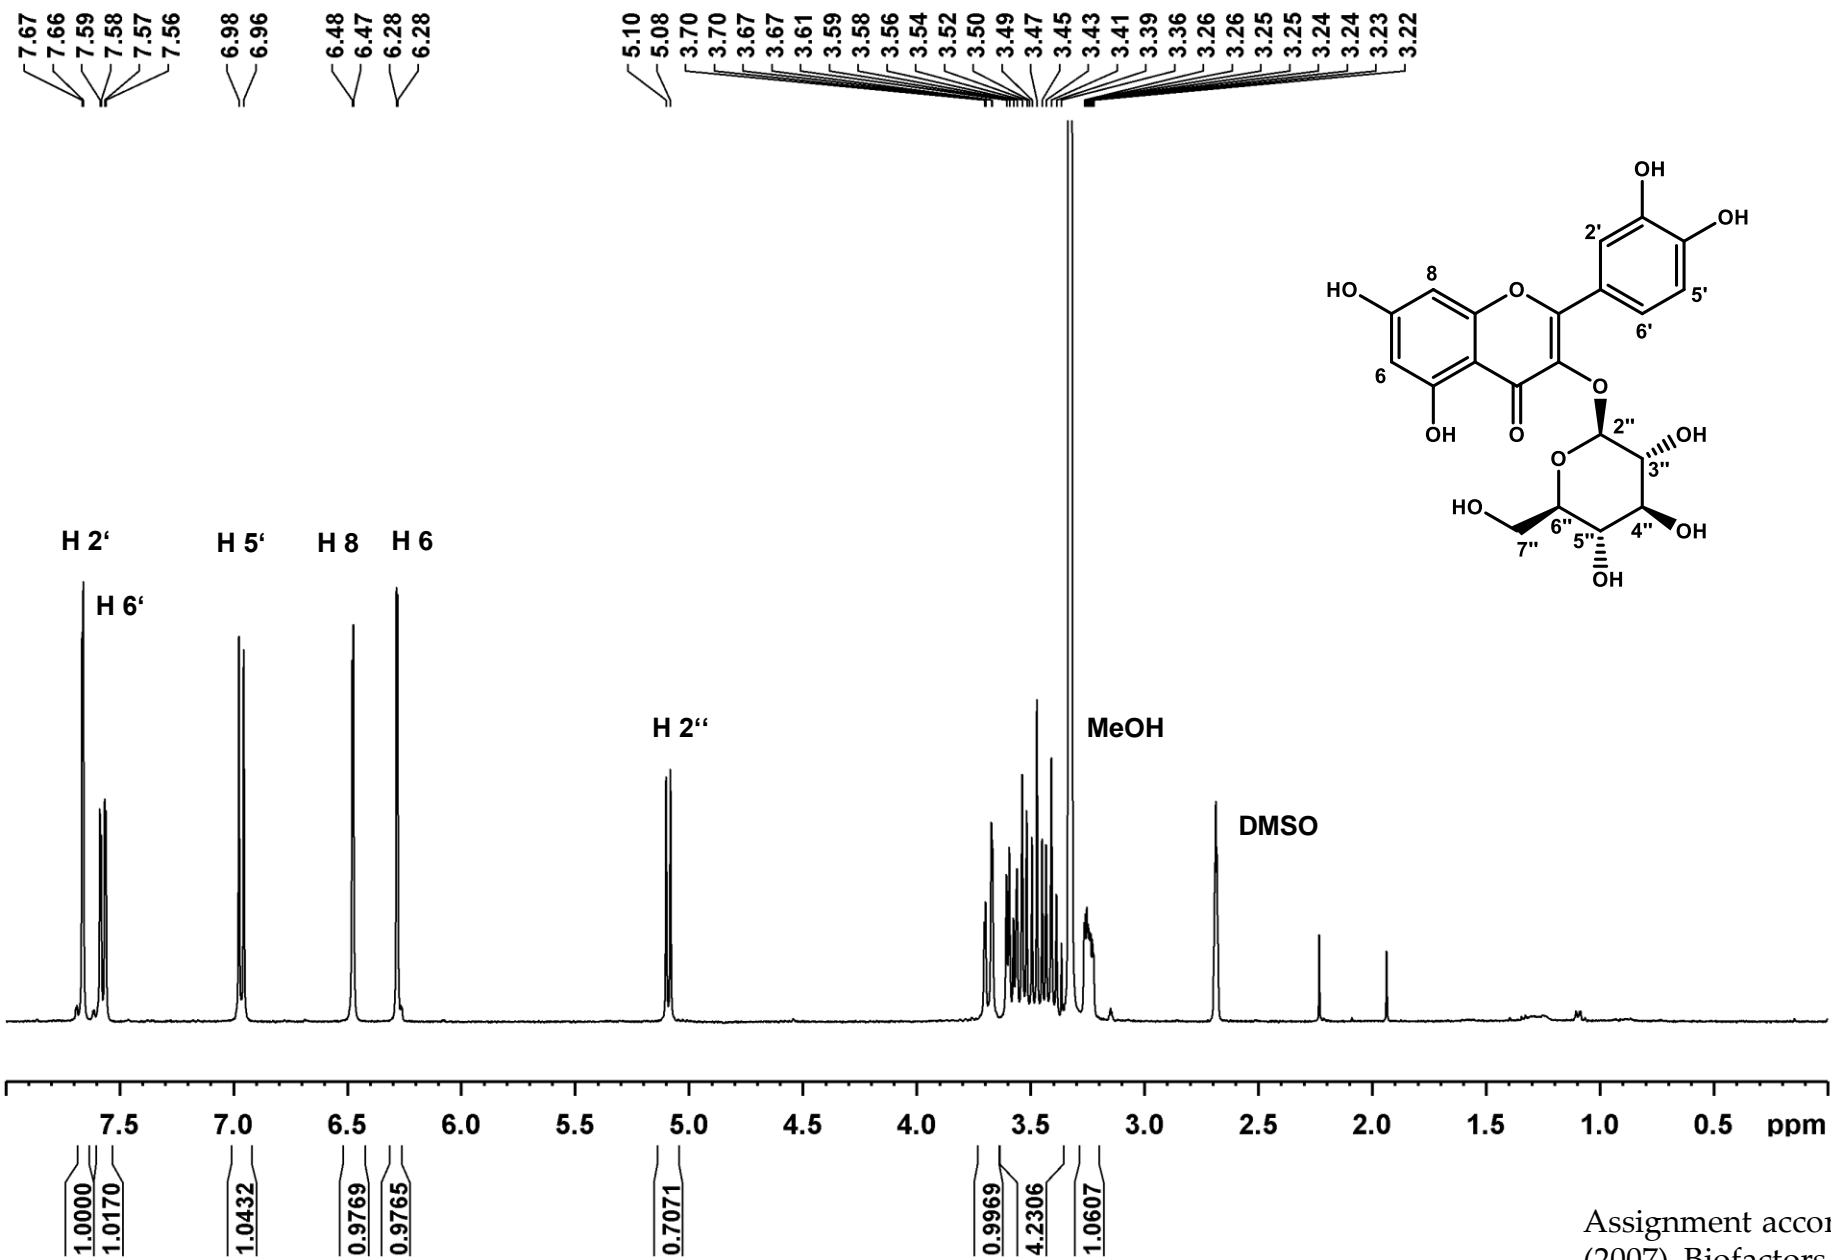

Assignment according to Panda and Kar (2007). Biofactors, 31, 201–210.

# phlorizin

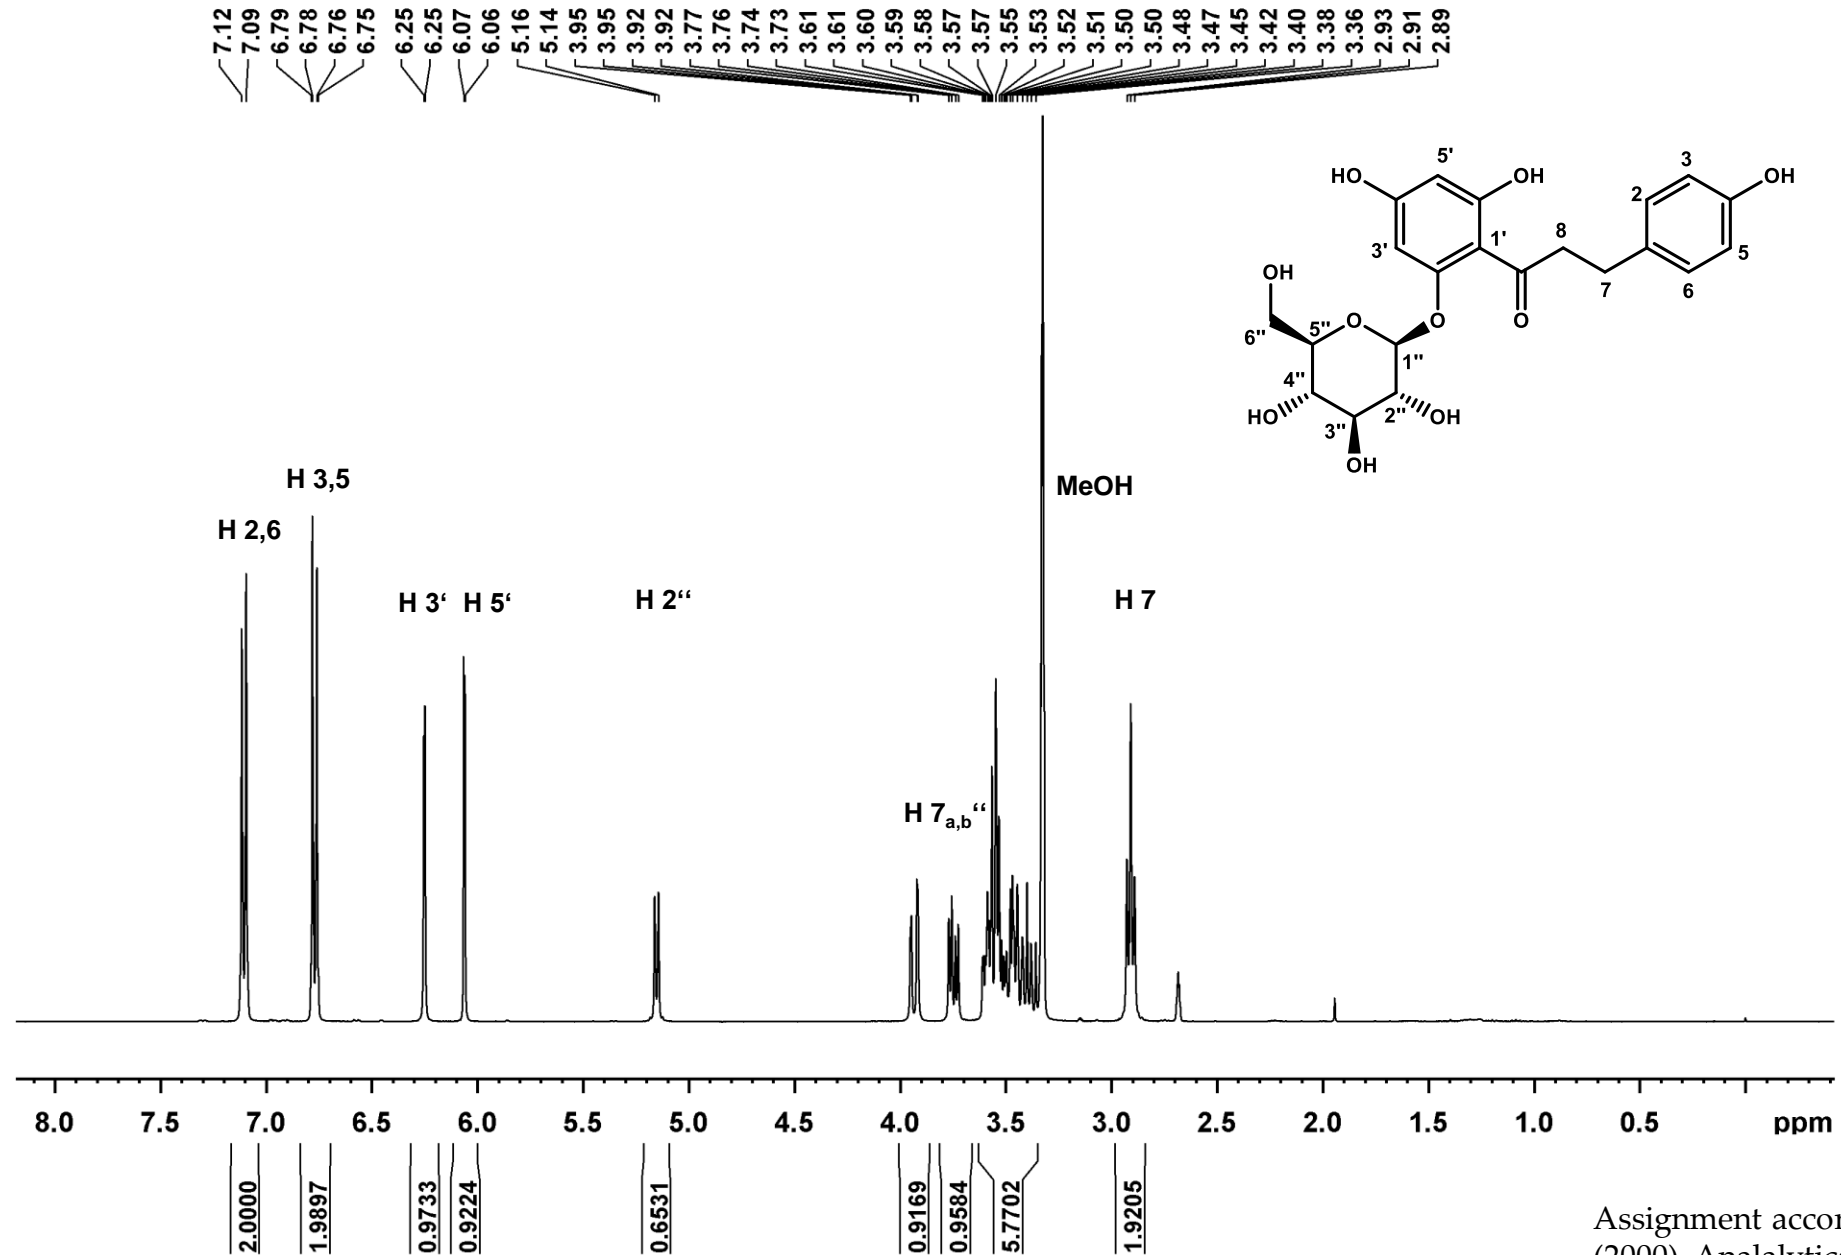

Assignment according to Lommen et al. (2000). Analytical Chemistry, 2000, 72, 1793-1797.

isorhamnetin-3- O-rutinoside

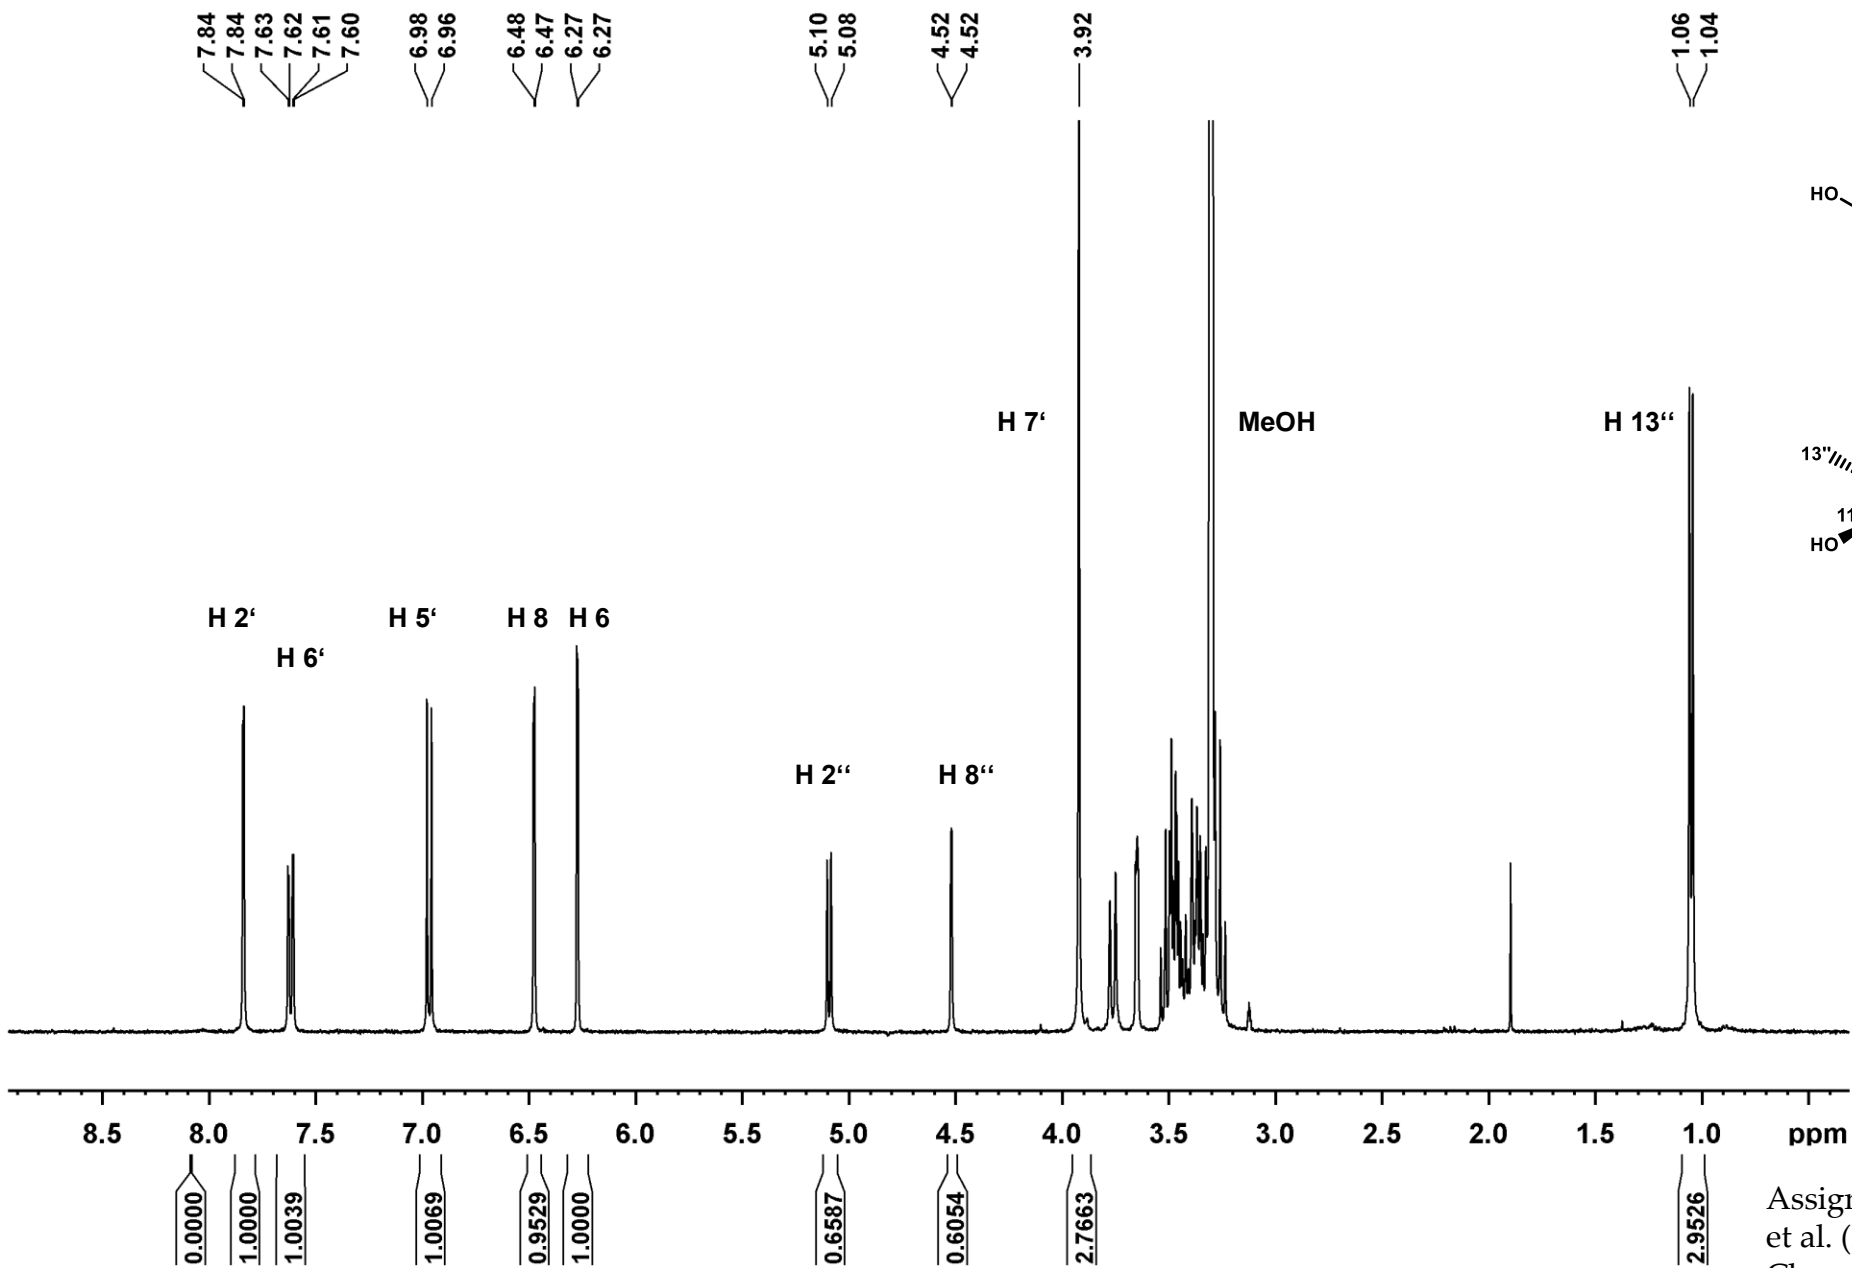

Assignment according to Cao et al. (2009). Journal of Liquid Chromatography & Related Technologies, 32, 273–280.

resveratrol

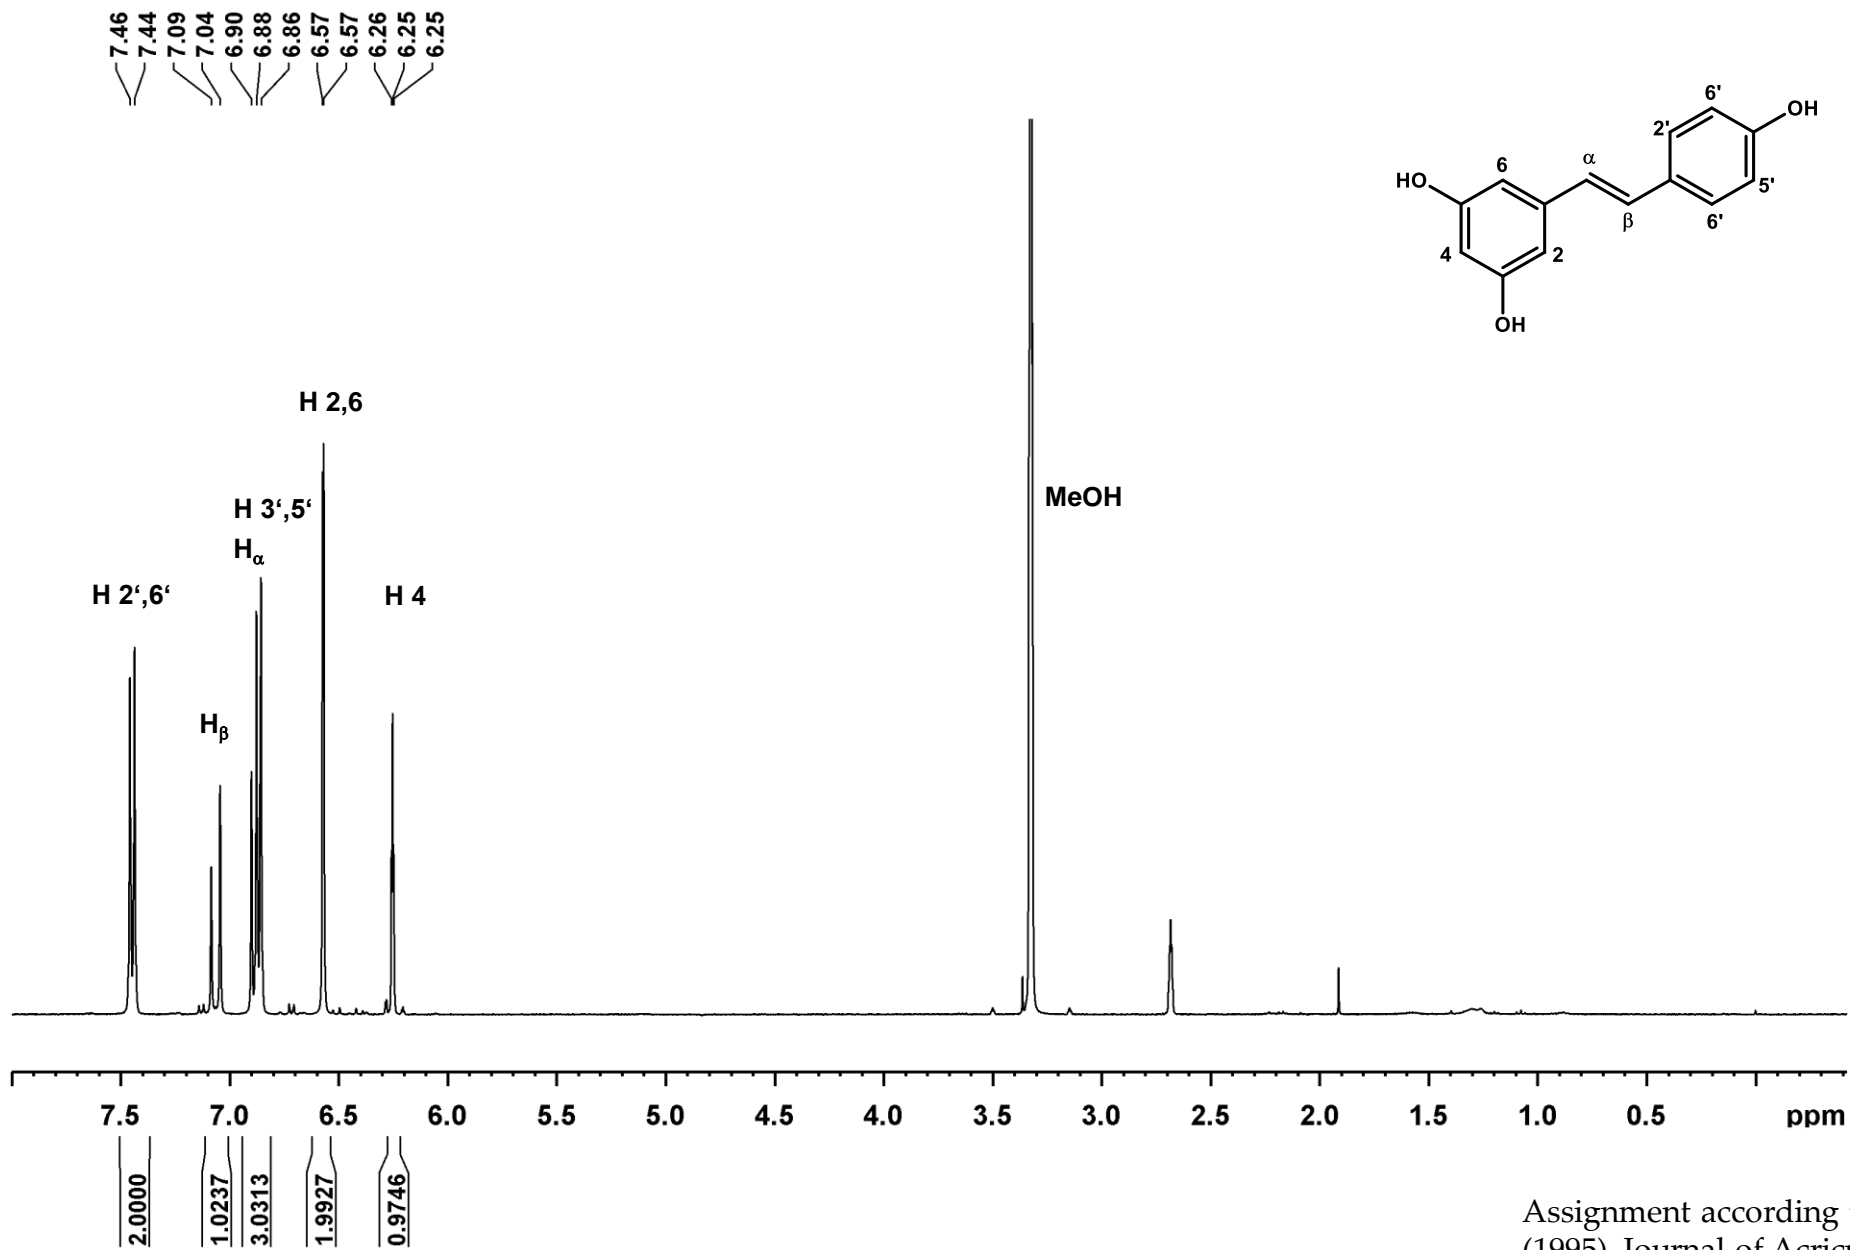

Assignment according to Mattivi et al. (1995). Journal of Agricultural and Food Chemistry, 43, 1820-1823.

# EGCG

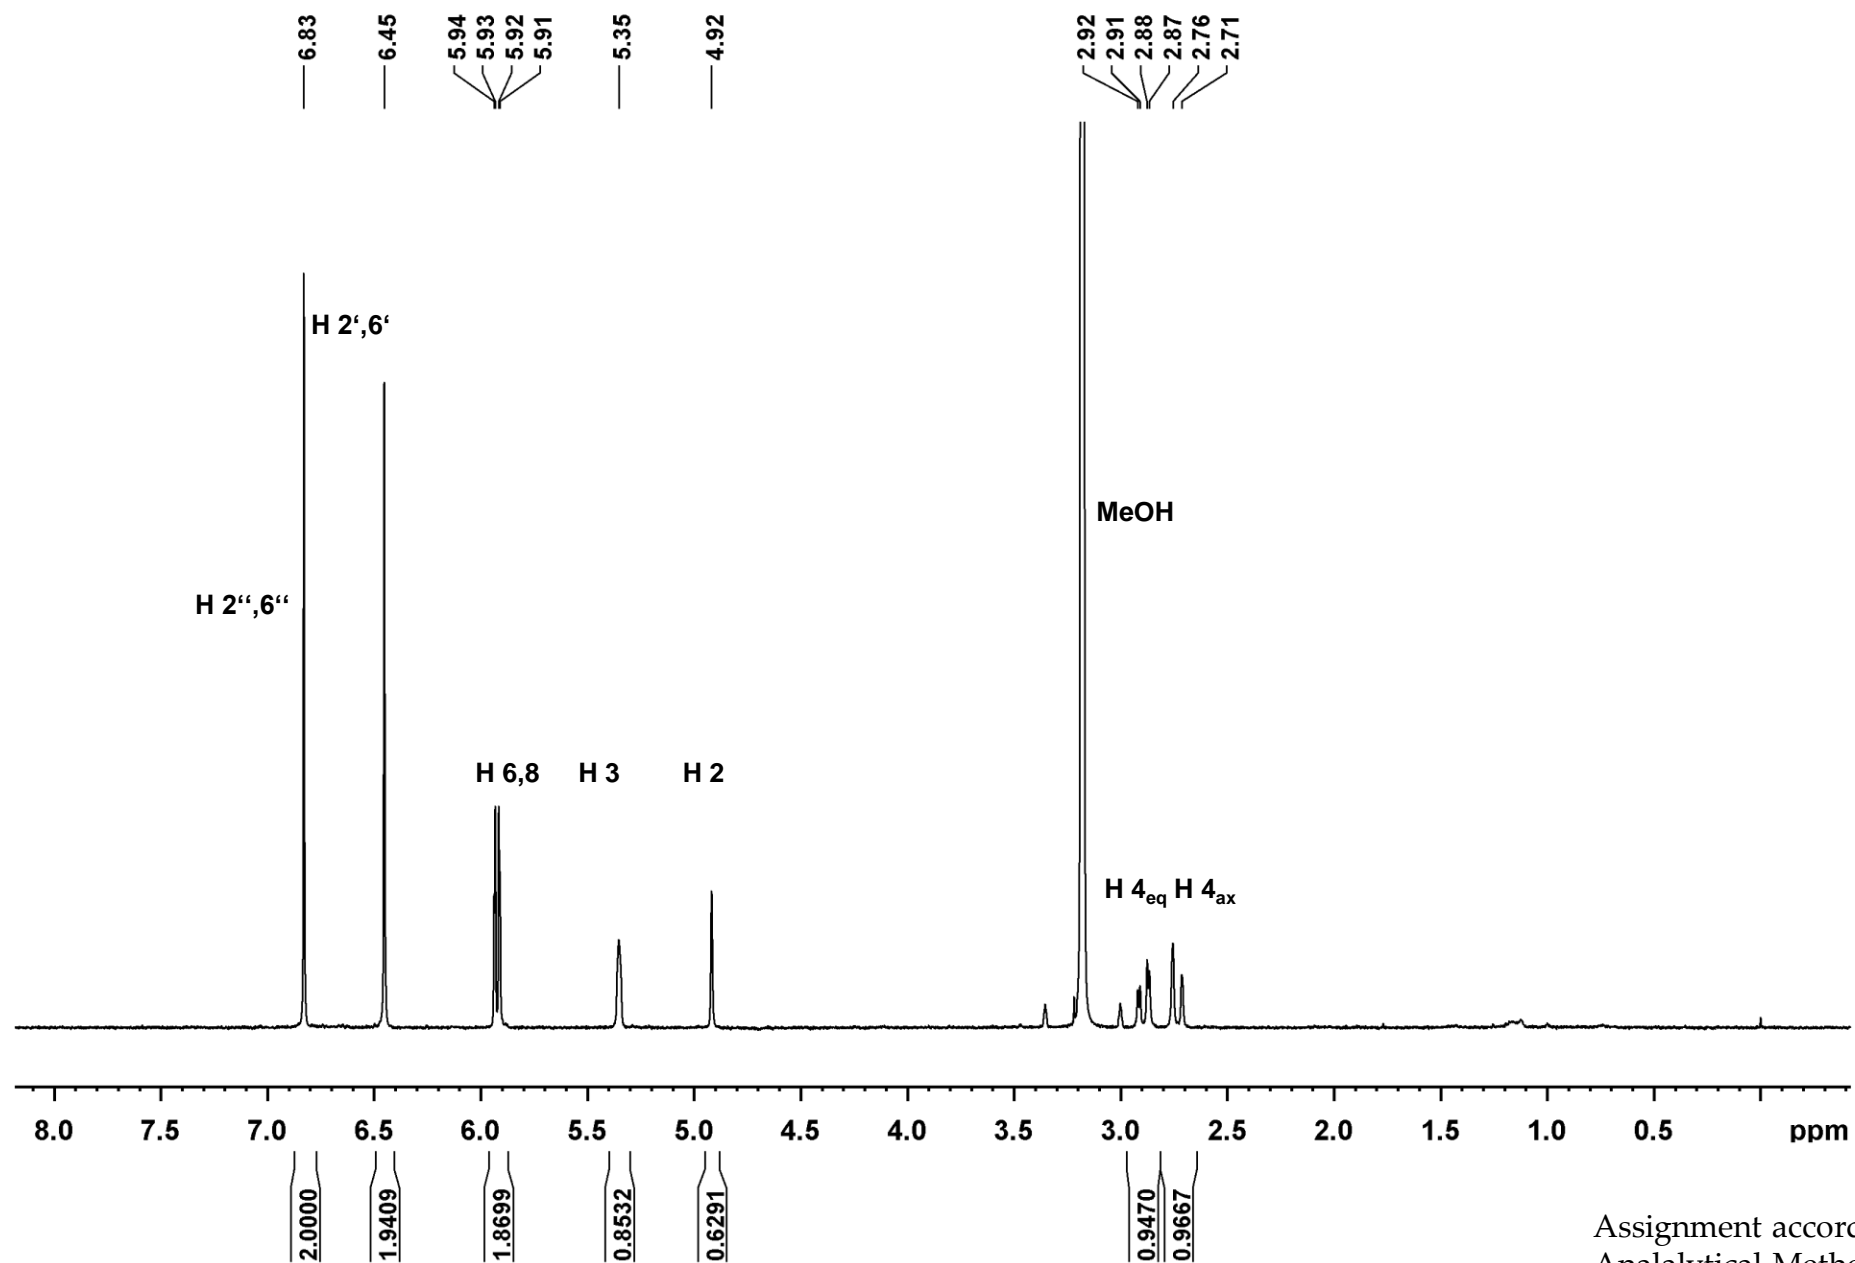

Assignment according to Yuan et al. (2014).  
Analytical Methods, 6, 907-914.
